# Supplementary material
Source: PubMed Central journal article supplement (PMC8450176)
Supplement: 251_2021_1228_MOESM6_ESM.pdf [file 251_2021_1228_MOESM6_ESM.pdf]

## Population Coverage Calculation Result

| population/area                 | Class I               |                          |                   |                       | Class II                 |                   |                       |                          | Class combined    |                       |                          |                   |
|---------------------------------|-----------------------|--------------------------|-------------------|-----------------------|--------------------------|-------------------|-----------------------|--------------------------|-------------------|-----------------------|--------------------------|-------------------|
|                                 | coverage <sup>a</sup> | average_hit <sup>b</sup> | pc90 <sup>c</sup> | coverage <sup>a</sup> | average_hit <sup>b</sup> | pc90 <sup>c</sup> | coverage <sup>a</sup> | average_hit <sup>b</sup> | pc90 <sup>c</sup> | coverage <sup>a</sup> | average_hit <sup>b</sup> | pc90 <sup>c</sup> |
| <a href="#">Central Africa</a>  | 41.19%                | 0.97                     | 0.17              | 99.72%                | 4.8                      | 3.04              | 99.84%                | 5.77                     | 3.44              |                       |                          |                   |
| <a href="#">Central America</a> | 1.4%                  | 0.03                     | 0.2               | 90.46%                | 2.96                     | 1.1               | 90.6%                 | 2.99                     | 1.14              |                       |                          |                   |
| <a href="#">East Africa</a>     | 46.46%                | 1.24                     | 0.19              | 99.77%                | 5.24                     | 3.3               | 99.88%                | 6.48                     | 3.95              |                       |                          |                   |
| <a href="#">East Asia</a>       | 72.89%                | 1.53                     | 0.37              | 92.44%                | 3.33                     | 1.28              | 97.95%                | 4.86                     | 2.3               |                       |                          |                   |
| <a href="#">Europe</a>          | 86.51%                | 2.9                      | 0.74              | 99.98%                | 5.32                     | 3.57              | 100.0%                | 8.22                     | 5.45              |                       |                          |                   |
| <a href="#">North Africa</a>    | 52.35%                | 1.41                     | 0.21              | 94.74%                | 3.0                      | 1.34              | 97.5%                 | 4.4                      | 2.03              |                       |                          |                   |
| <a href="#">North America</a>   | 78.04%                | 2.32                     | 0.46              | 99.99%                | 5.47                     | 3.58              | 100.0%                | 7.79                     | 5.07              |                       |                          |                   |
| <a href="#">Northeast Asia</a>  | 48.93%                | 0.97                     | 0.19              | 98.16%                | 4.62                     | 2.49              | 99.02%                | 5.6                      | 3.06              |                       |                          |                   |
| <a href="#">Oceania</a>         | 71.42%                | 1.41                     | 0.35              | 98.79%                | 5.14                     | 2.86              | 99.65%                | 6.55                     | 3.88              |                       |                          |                   |
| <a href="#">South Africa</a>    | 40.03%                | 0.8                      | 0.17              | 0.0%                  | 0.0                      | 0.0               | 40.03%                | 0.8                      | 0.17              |                       |                          |                   |
| <a href="#">South America</a>   | 53.26%                | 1.2                      | 0.21              | 99.71%                | 5.63                     | 3.62              | 99.86%                | 6.83                     | 4.23              |                       |                          |                   |
| <a href="#">South Asia</a>      | 47.74%                | 1.06                     | 0.19              | 99.82%                | 4.97                     | 3.19              | 99.91%                | 6.03                     | 3.69              |                       |                          |                   |
| <a href="#">Southeast Asia</a>  | 63.12%                | 1.33                     | 0.27              | 91.01%                | 2.85                     | 1.08              | 96.69%                | 4.18                     | 1.93              |                       |                          |                   |
| <a href="#">Southeast Asia</a>  | 53.62%                | 1.42                     | 0.22              | 95.63%                | 3.03                     | 1.37              | 97.97%                | 4.45                     | 2.04              |                       |                          |                   |
| <a href="#">West Africa</a>     | 48.73%                | 1.26                     | 0.2               | 99.8%                 | 4.99                     | 3.23              | 99.95%                | 6.25                     | 3.88              |                       |                          |                   |
| <a href="#">West Asia</a>       | 71.41%                | 2.01                     | 0.35              | 80.46%                | 1.88                     | 0.61              | 94.42%                | 3.9                      | 1.51              |                       |                          |                   |
| Average                         | 54.69                 | 1.37                     | 0.28              | 90.04                 | 3.95                     | 2.22              | 94.58                 | 5.32                     | 3.39              |                       |                          |                   |
| Standard deviation              | 19.33                 | 0.63                     | 0.15              | 23.81                 | 1.53                     | 1.18              | 14.3                  | 1.81                     | 1.42              |                       |                          |                   |

<sup>a</sup> projected population coverage  
<sup>b</sup> average number of epitope hits / HLA combinations recognized by the population  
<sup>c</sup> minimum number of epitope hits / HLA combinations recognized by 90% of the population

## Population: Central Africa

| MHC class | Coverage | Average hit | PC90 |
|-----------|----------|-------------|------|
| I         | 41.19%   | 0.97        | 0.17 |

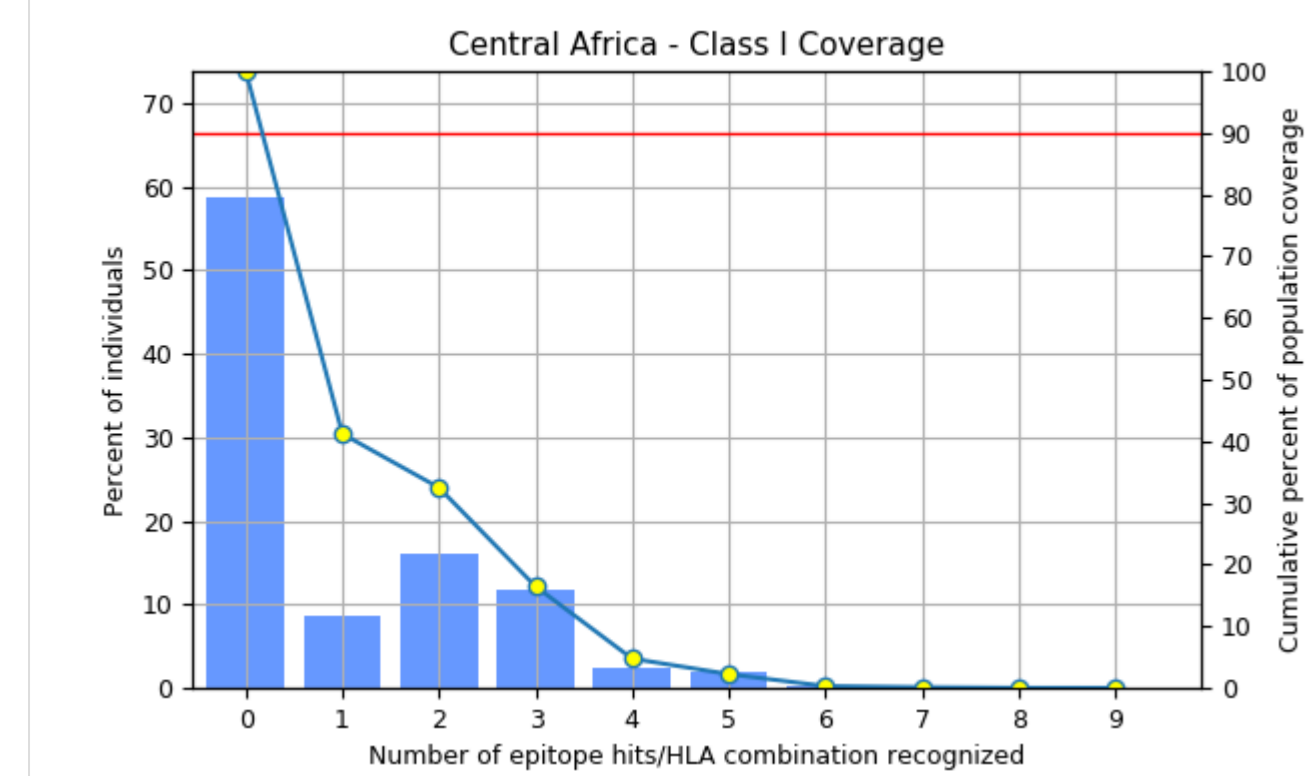View coverage of individual epitope in Central Africa [Back to top](#)

| MHC class | Coverage | Average hit | PC90 |
|-----------|----------|-------------|------|
| II        | 99.72%   | 4.8         | 3.04 |

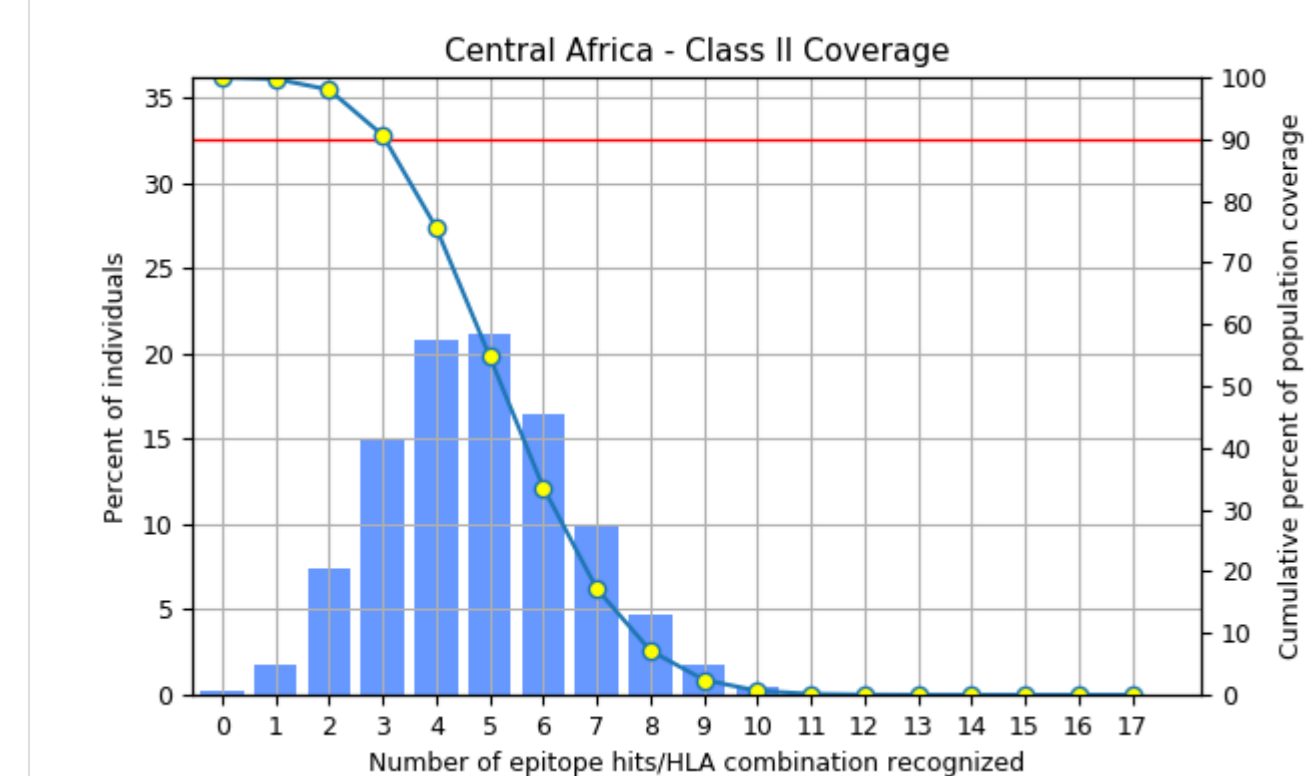View coverage of individual epitope in Central Africa [Back to top](#)

| MHC class | Coverage | Average hit | PC90 |
|-----------|----------|-------------|------|
| combined  | 99.84%   | 5.77        | 3.44 |

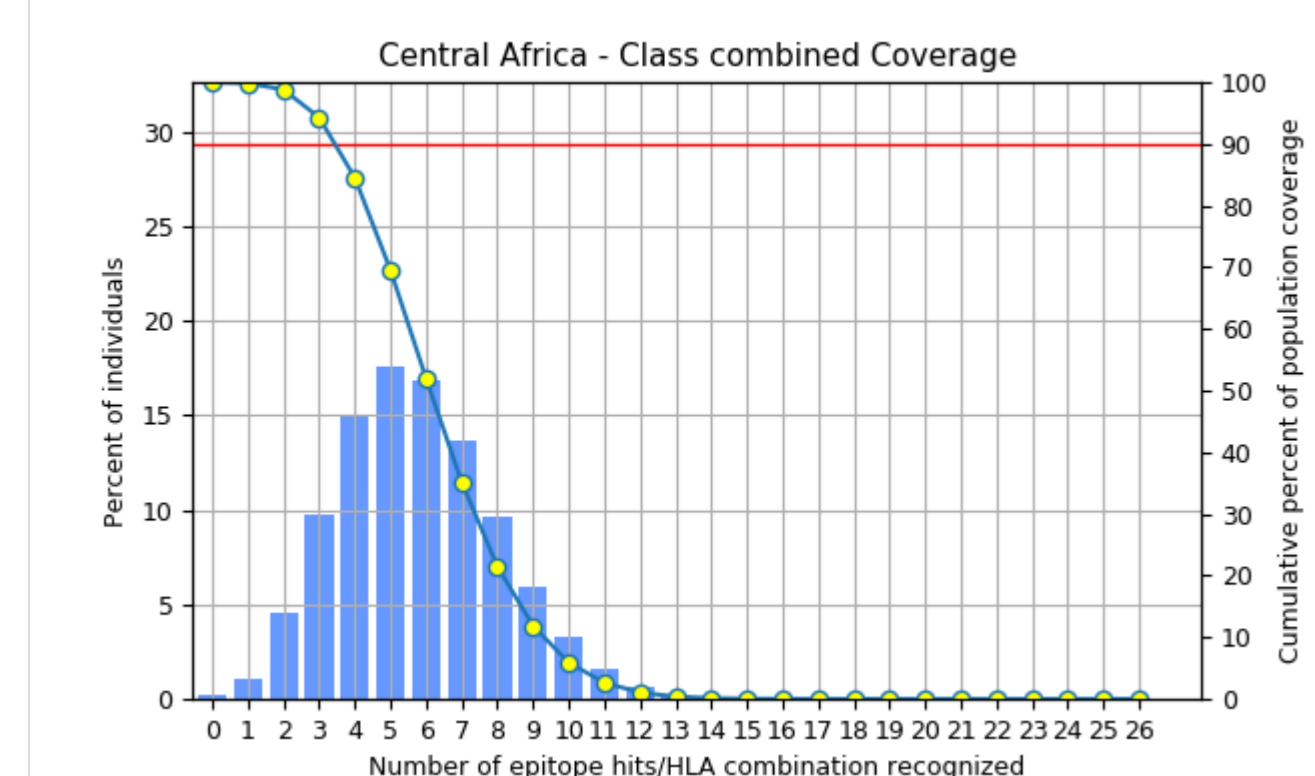View coverage of individual epitope in Central Africa [Back to top](#)

## Population: Central America

| MHC class | Coverage | Average hit | PC90 |
|-----------|----------|-------------|------|
| I         | 1.4%     | 0.03        | 0.2  |

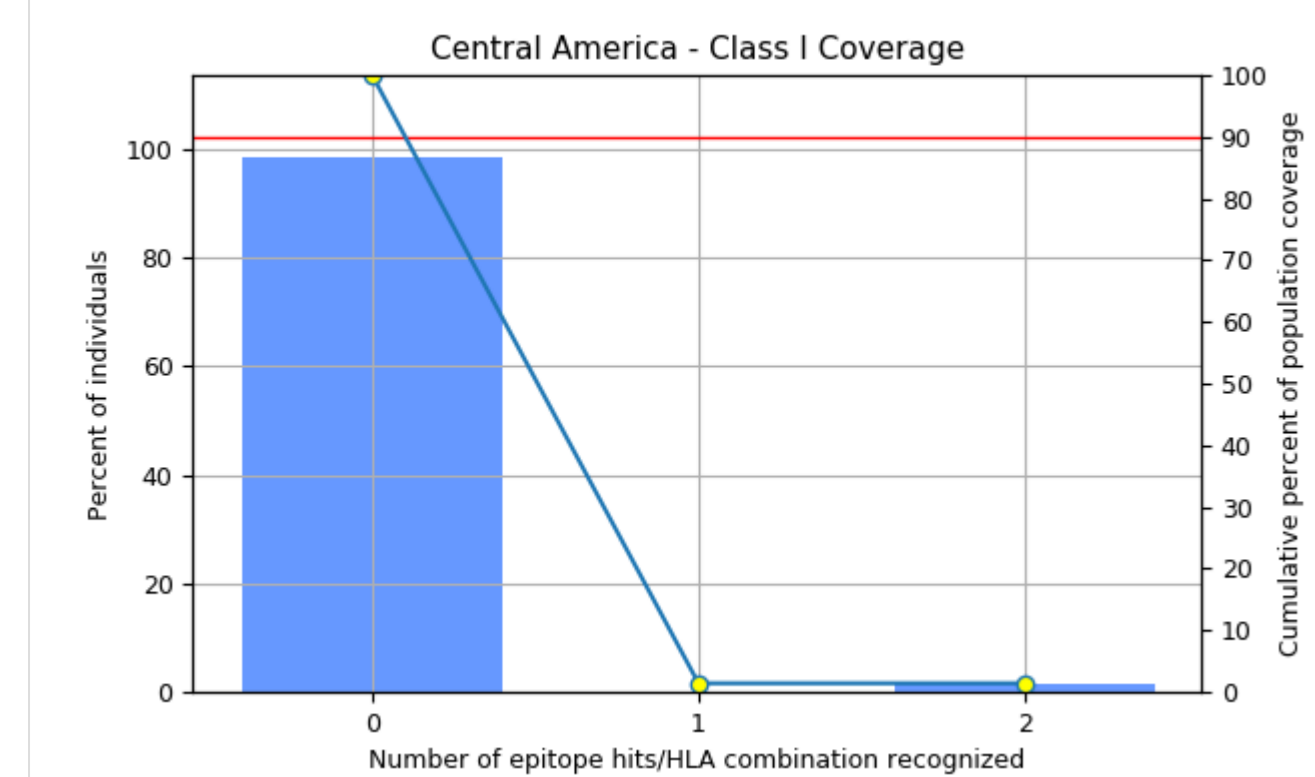View coverage of individual epitope in Central America [Back to top](#)

| MHC class | Coverage | Average hit | PC90 |
|-----------|----------|-------------|------|
| II        | 90.46%   | 2.96        | 1.1  |

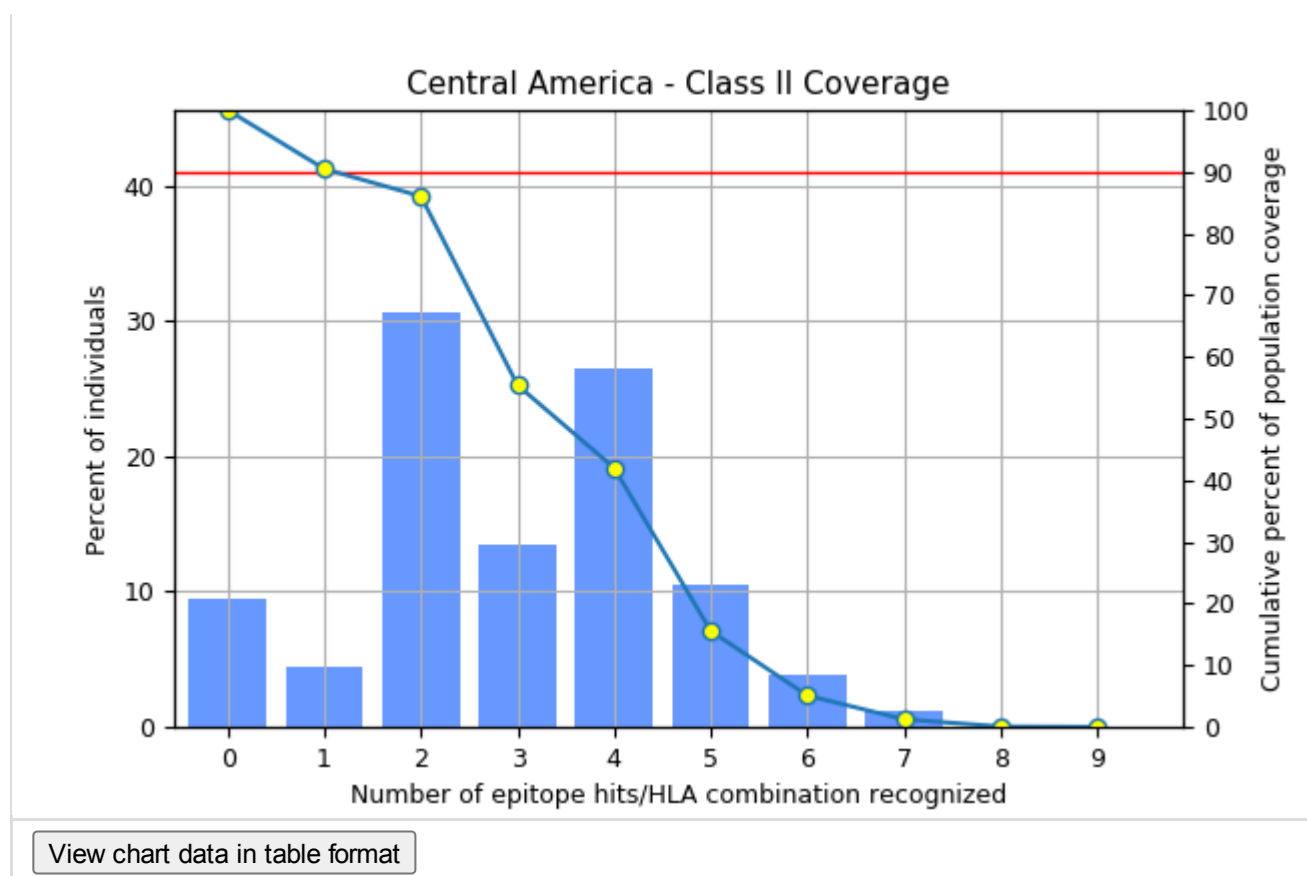

View coverage of individual epitope in Central America [Back to top](#)

| MHC class | Coverage | Average hit | PC90 |
|-----------|----------|-------------|------|
| combined  | 90.6%    | 2.99        | 1.14 |

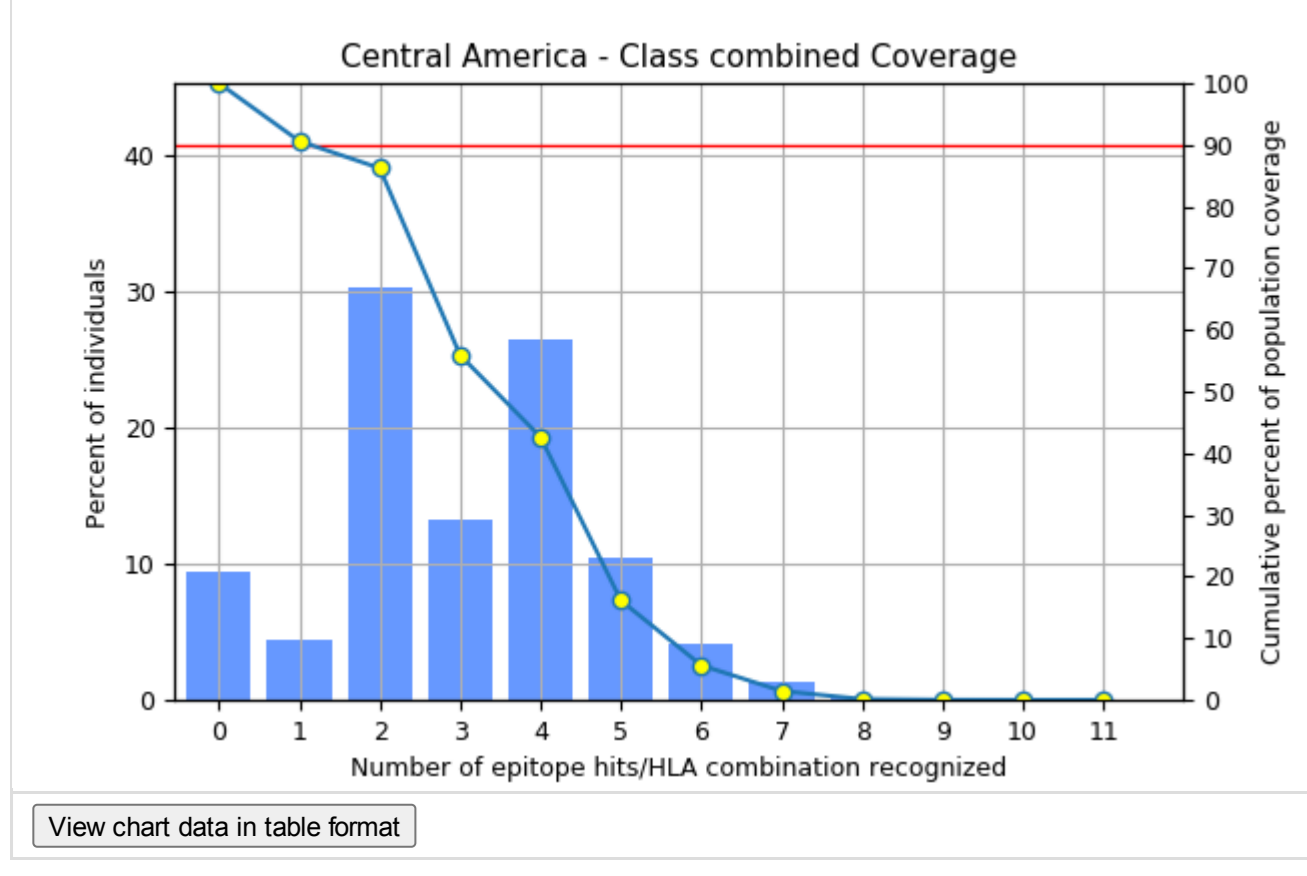

View coverage of individual epitope in Central America [Back to top](#)

**Population: East Africa**

| MHC class | Coverage | Average hit | PC90 |
|-----------|----------|-------------|------|
| I         | 46.46%   | 1.24        | 0.19 |

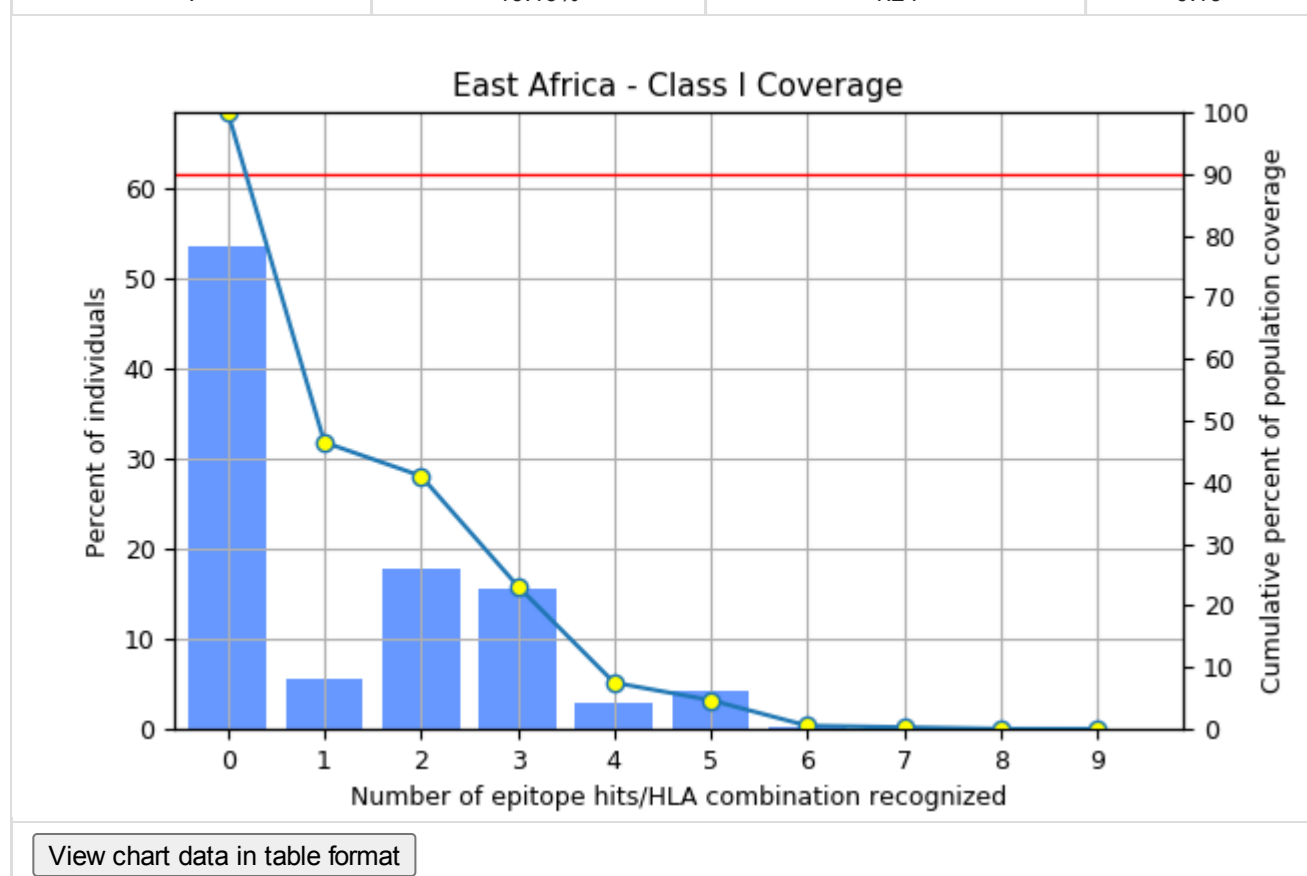

View coverage of individual epitope in East Africa [Back to top](#)

| MHC class | Coverage | Average hit | PC90 |
|-----------|----------|-------------|------|
| II        | 99.77%   | 5.24        | 3.3  |

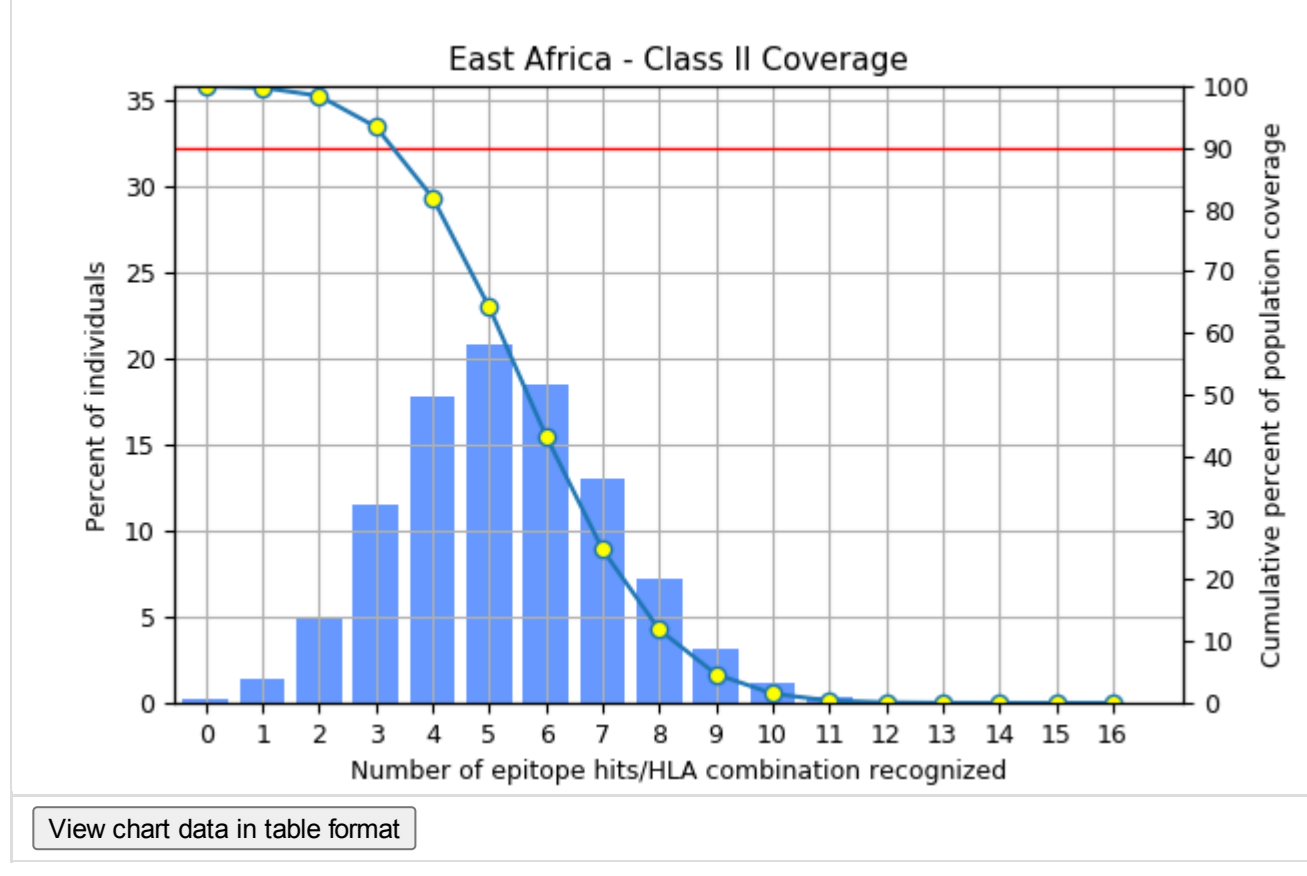

View coverage of individual epitope in East Africa [Back to top](#)

| MHC class | Coverage | Average hit | PC90 |
|-----------|----------|-------------|------|
| combined  | 99.88%   | 6.48        | 3.95 |

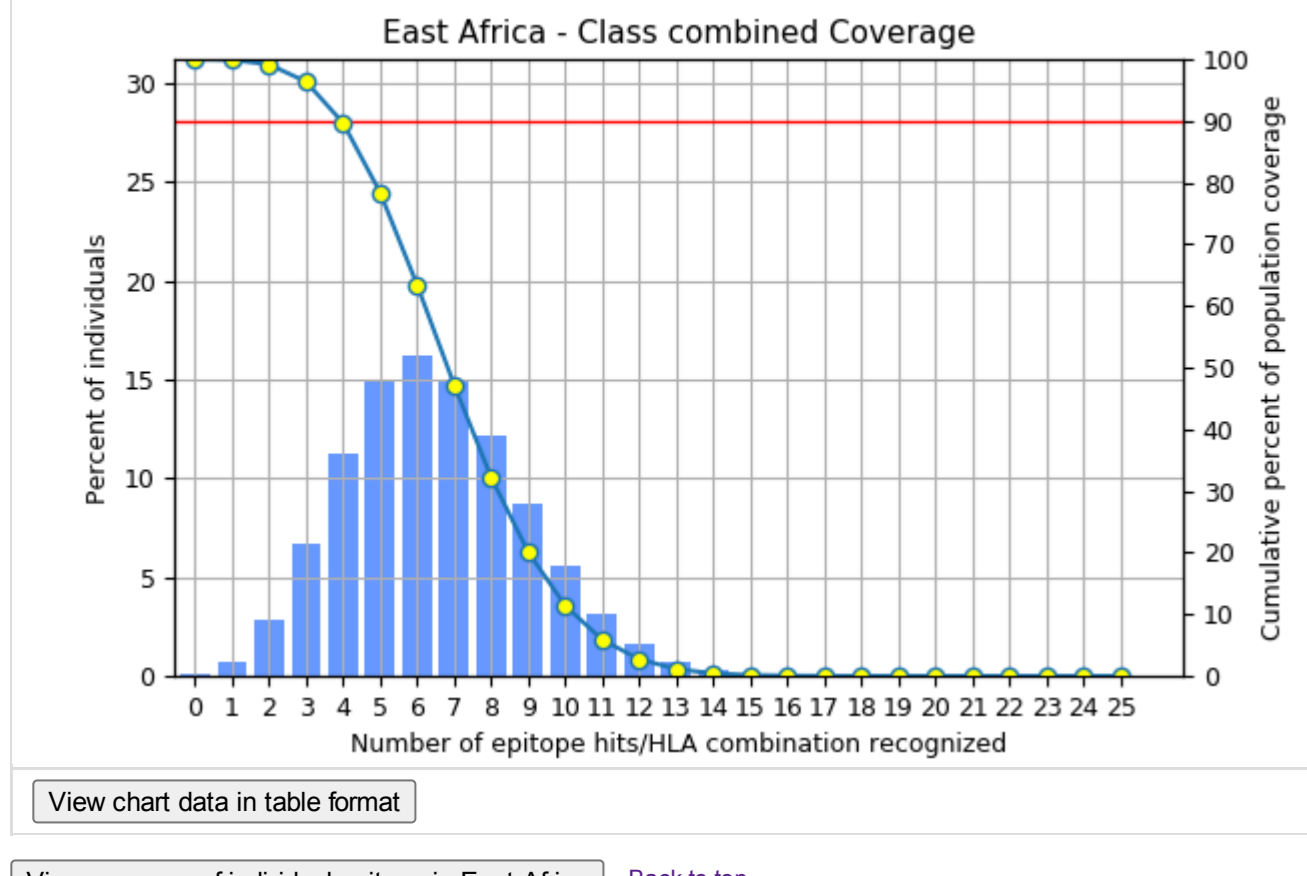

View coverage of individual epitope in East Africa [Back to top](#)

**Population: East Asia**

| MHC class | Coverage | Average hit | PC90 |
|-----------|----------|-------------|------|
| I         | 72.89%   | 1.53        | 0.37 |

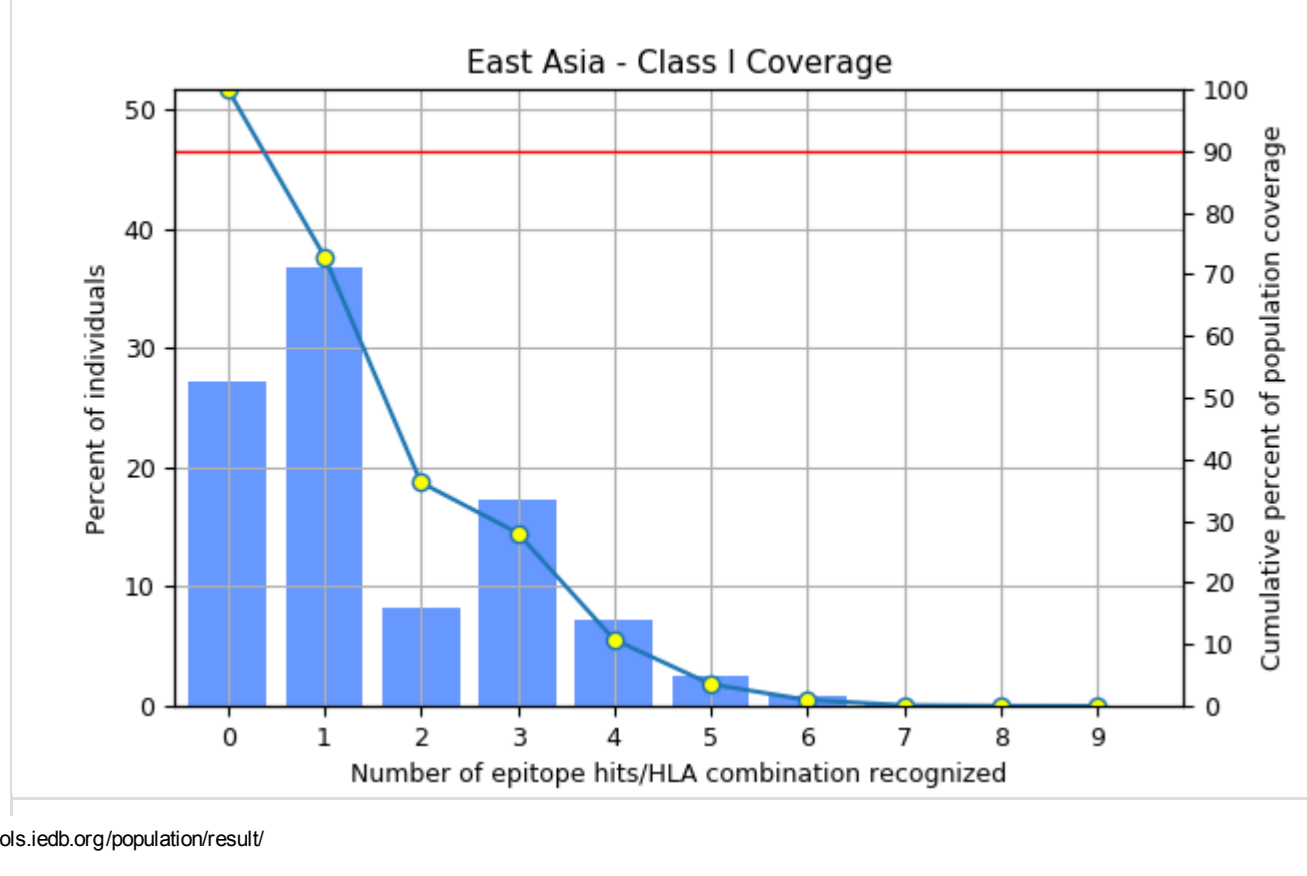

[View chart data in table format](#)View coverage of individual epitope in East Asia [Back to top](#)

| MHC class | Coverage | Average hit | PC90 |
|-----------|----------|-------------|------|
| II        | 92.44%   | 3.33        | 1.28 |

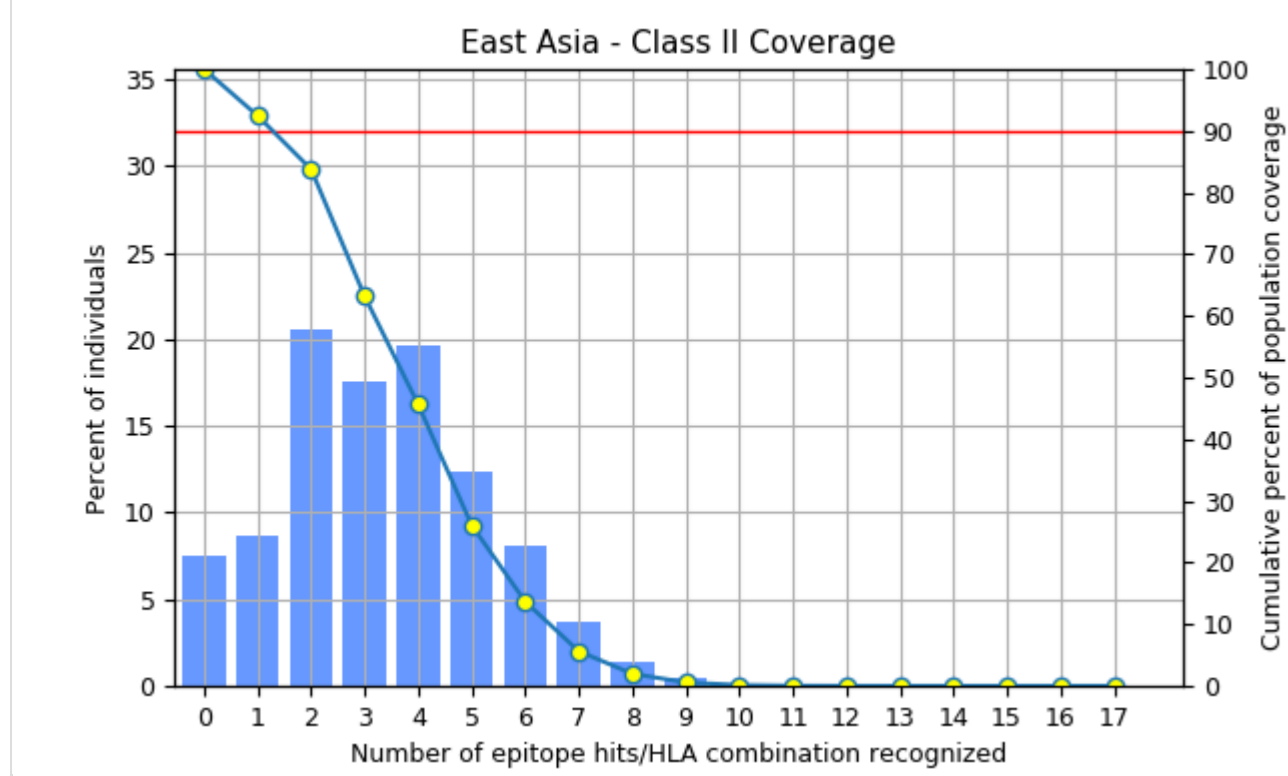[View chart data in table format](#)View coverage of individual epitope in East Asia [Back to top](#)

| MHC class | Coverage | Average hit | PC90 |
|-----------|----------|-------------|------|
| combined  | 97.95%   | 4.86        | 2.3  |

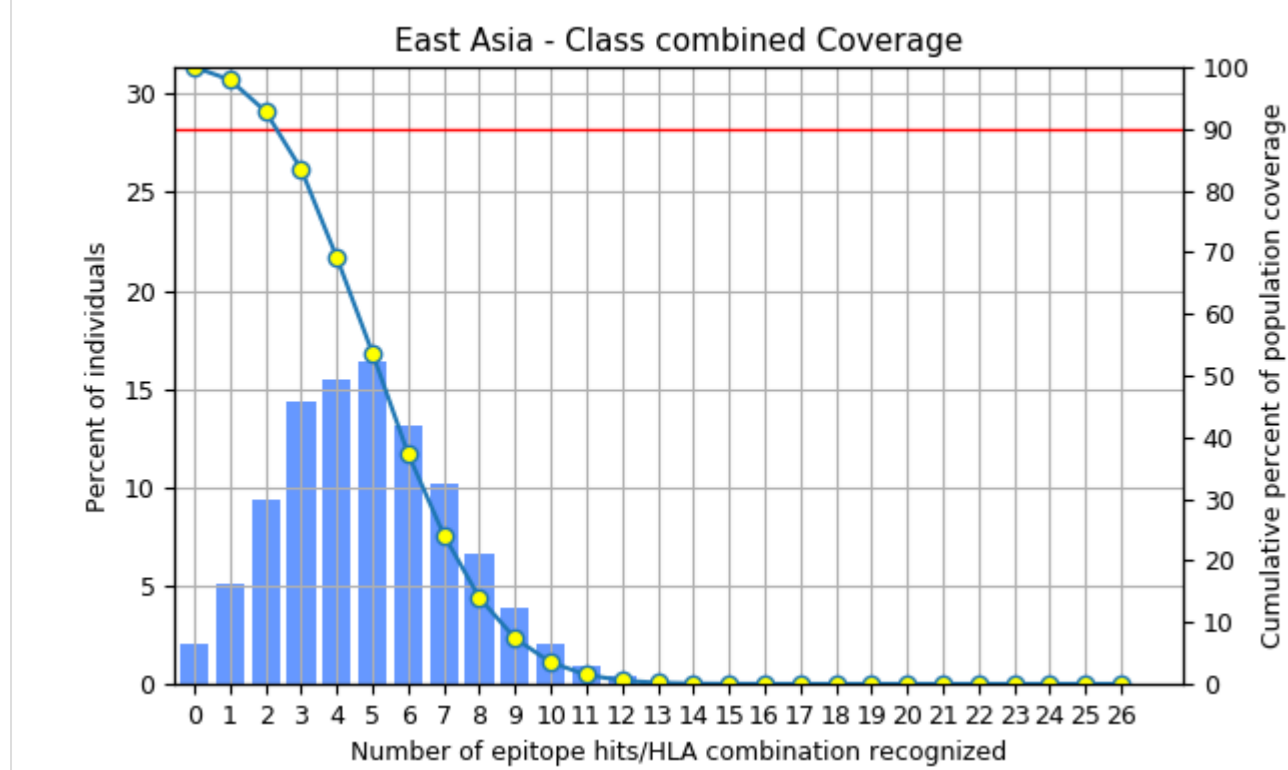[View chart data in table format](#)View coverage of individual epitope in East Asia [Back to top](#)**Population: Europe**

| MHC class | Coverage | Average hit | PC90 |
|-----------|----------|-------------|------|
| I         | 86.51%   | 2.9         | 0.74 |

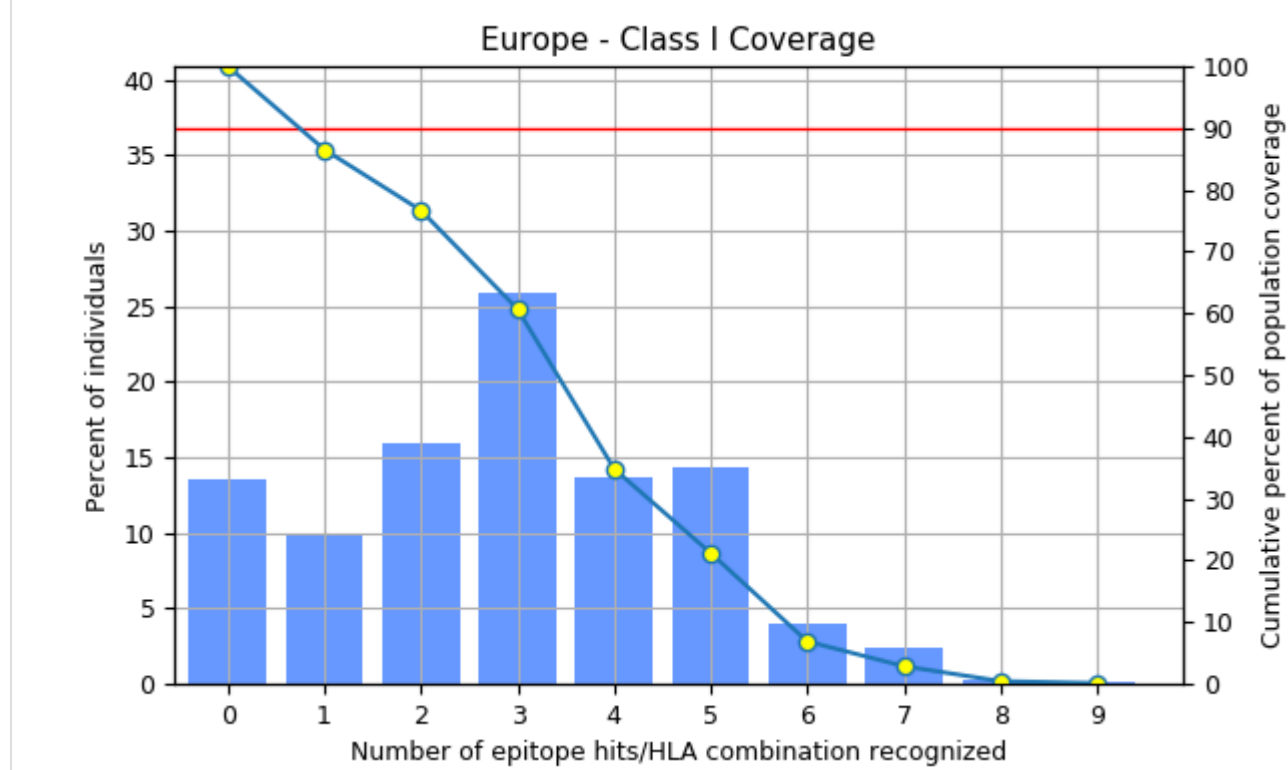[View chart data in table format](#)View coverage of individual epitope in Europe [Back to top](#)

| MHC class | Coverage | Average hit | PC90 |
|-----------|----------|-------------|------|
| II        | 99.98%   | 5.32        | 3.57 |

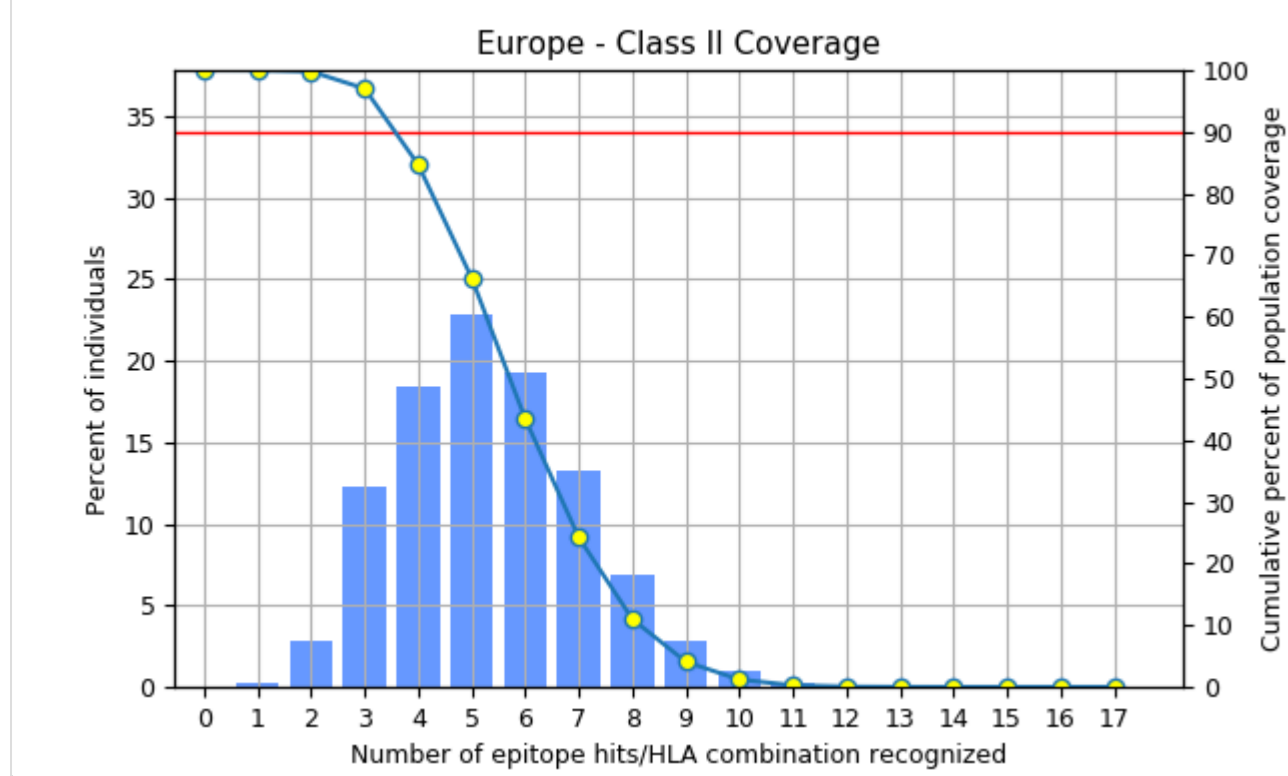[View chart data in table format](#)View coverage of individual epitope in Europe [Back to top](#)

| MHC class | Coverage | Average hit | PC90 |
|-----------|----------|-------------|------|
| combined  | 100.0%   | 8.22        | 5.45 |

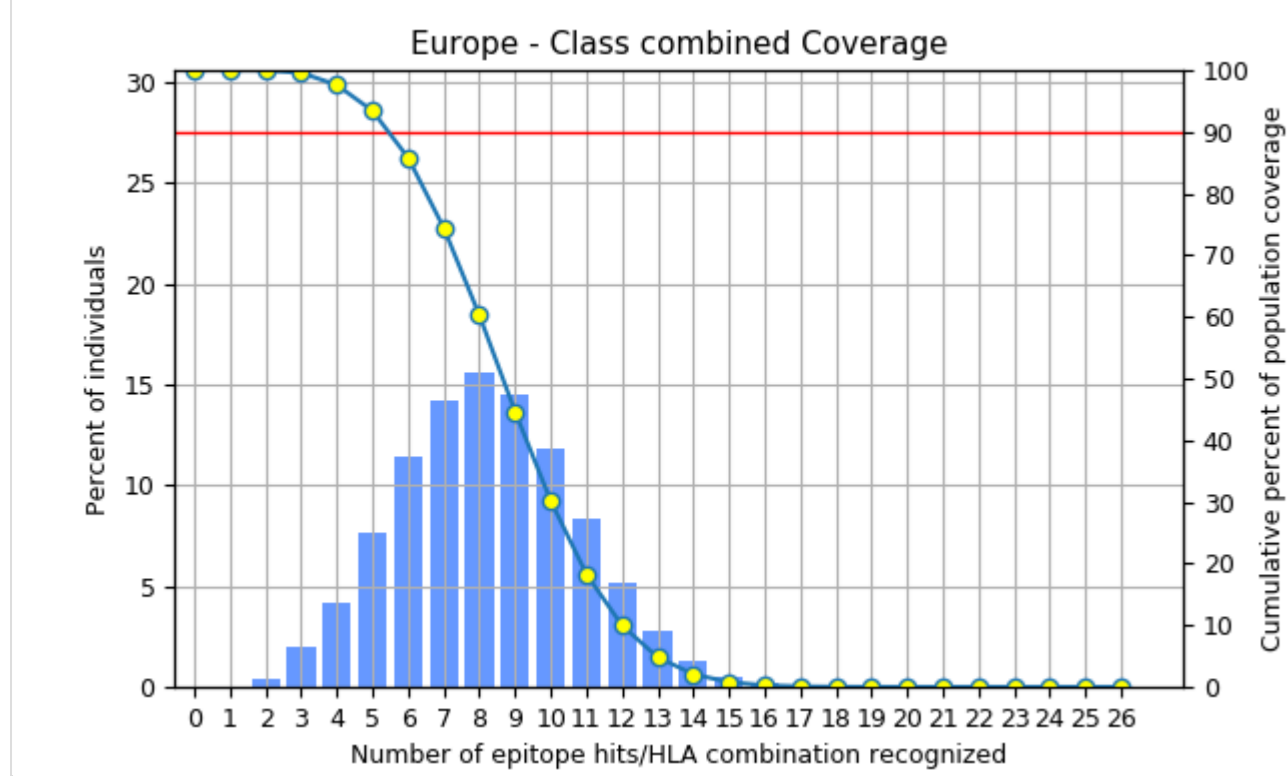[View chart data in table format](#)View coverage of individual epitope in Europe [Back to top](#)**Population: North Africa**

| MHC class | Coverage | Average hit | PC90 |
|-----------|----------|-------------|------|
| I         | 52.35%   | 1.41        | 0.21 |



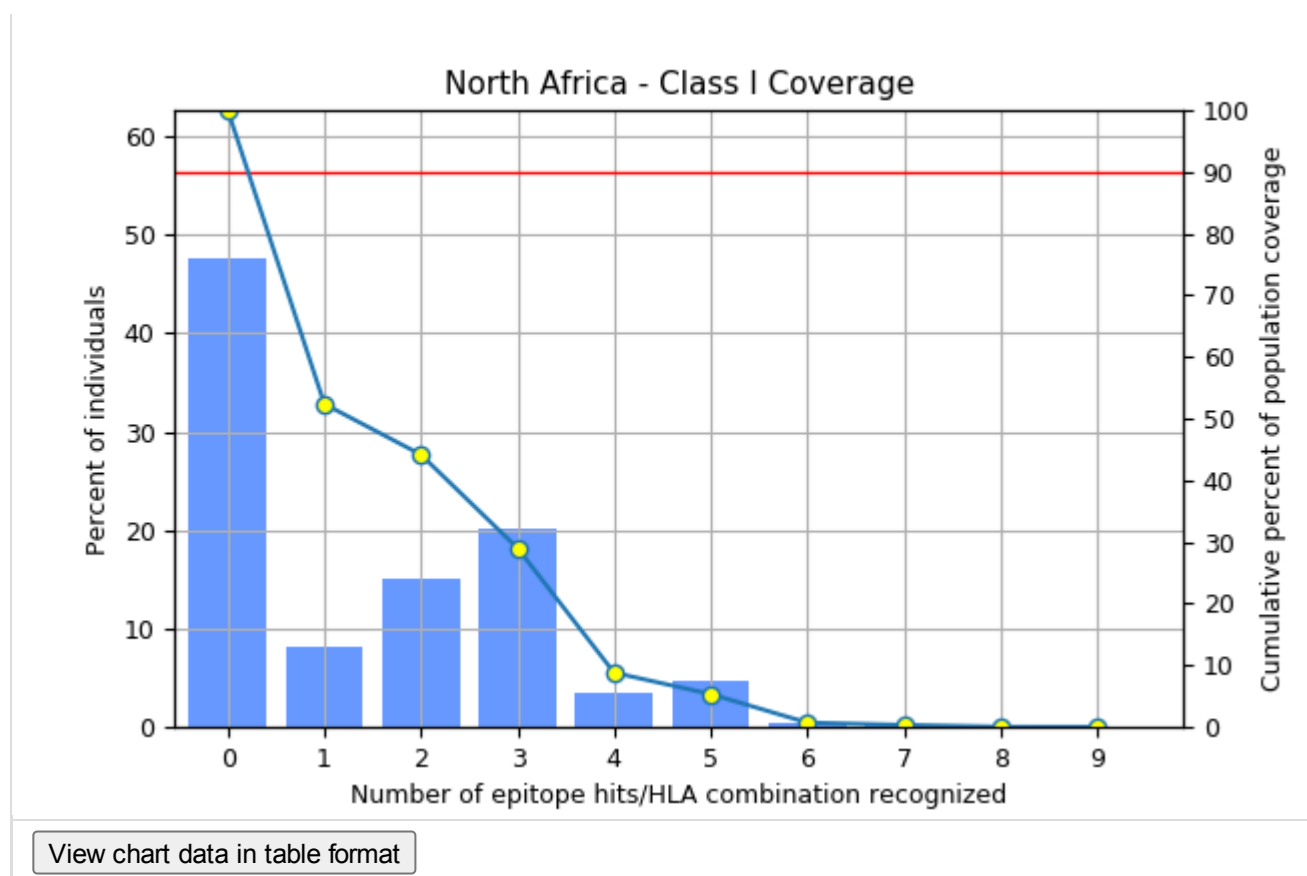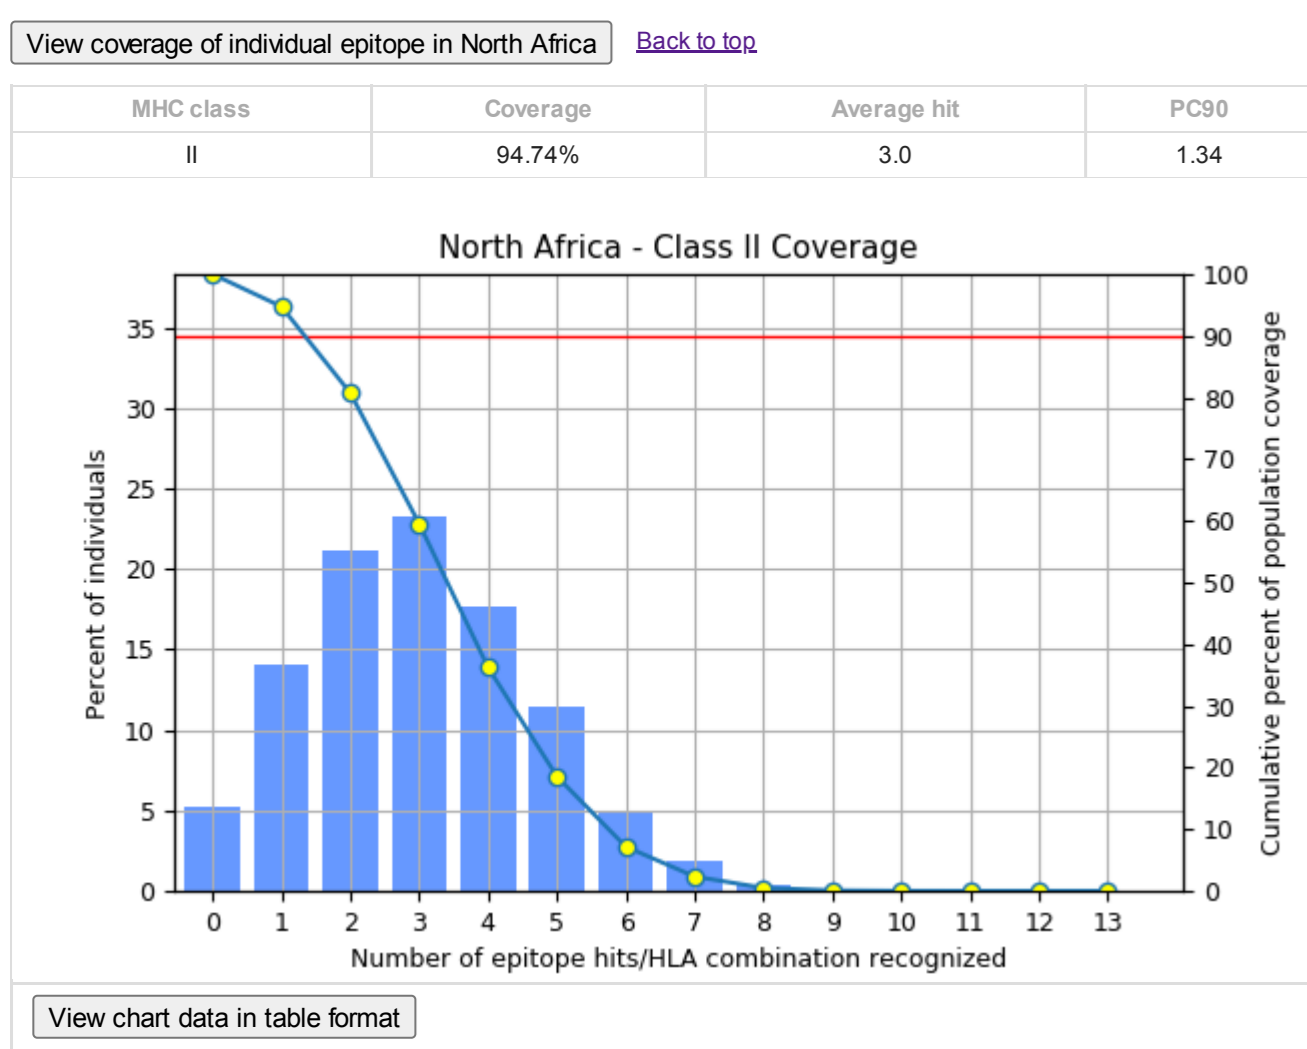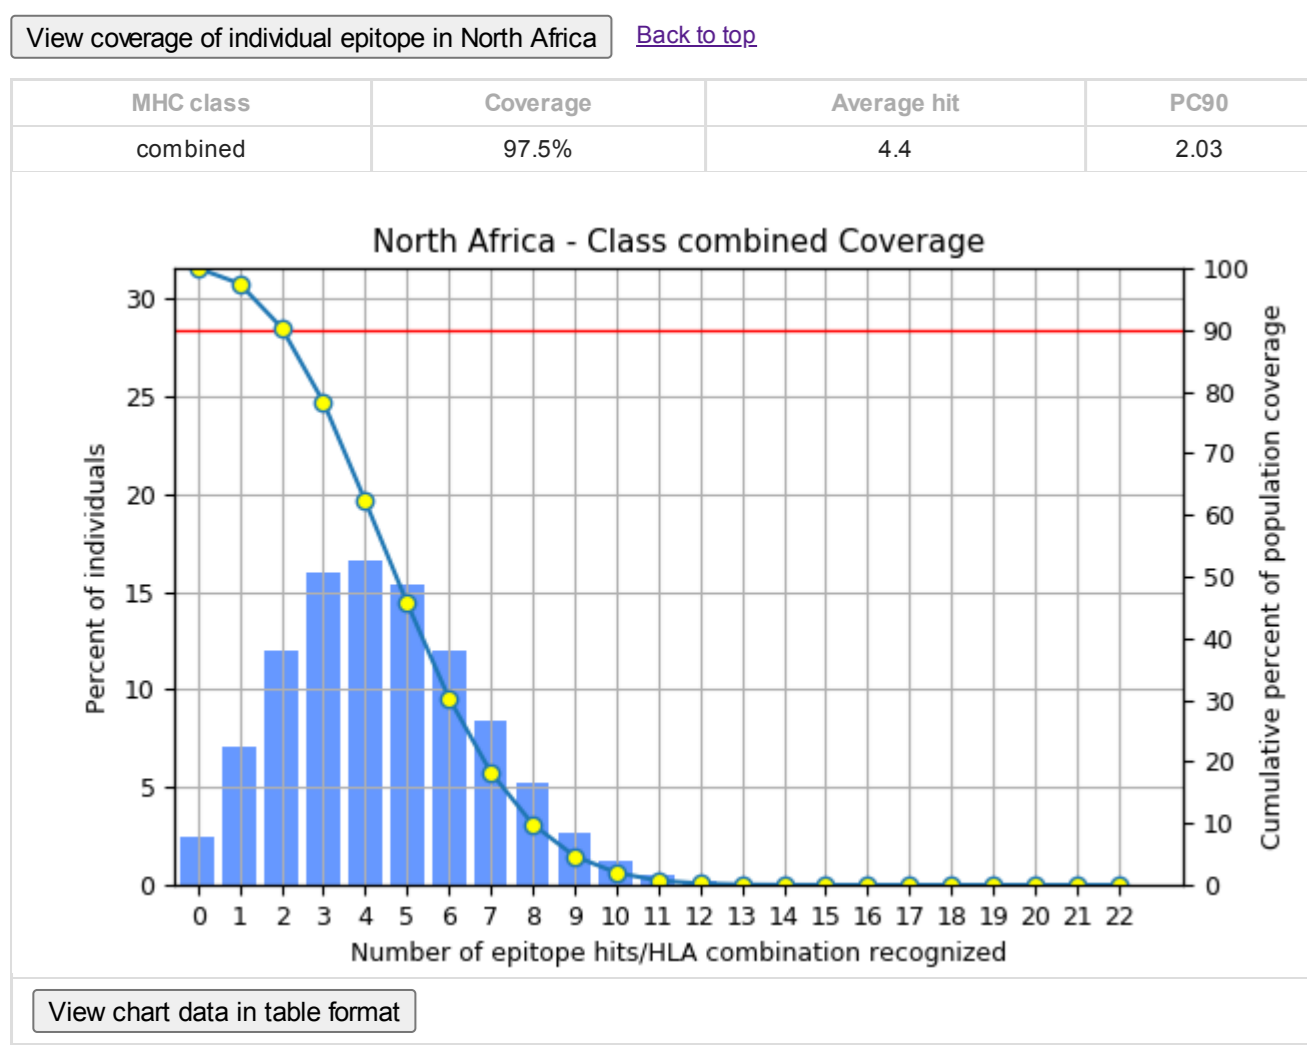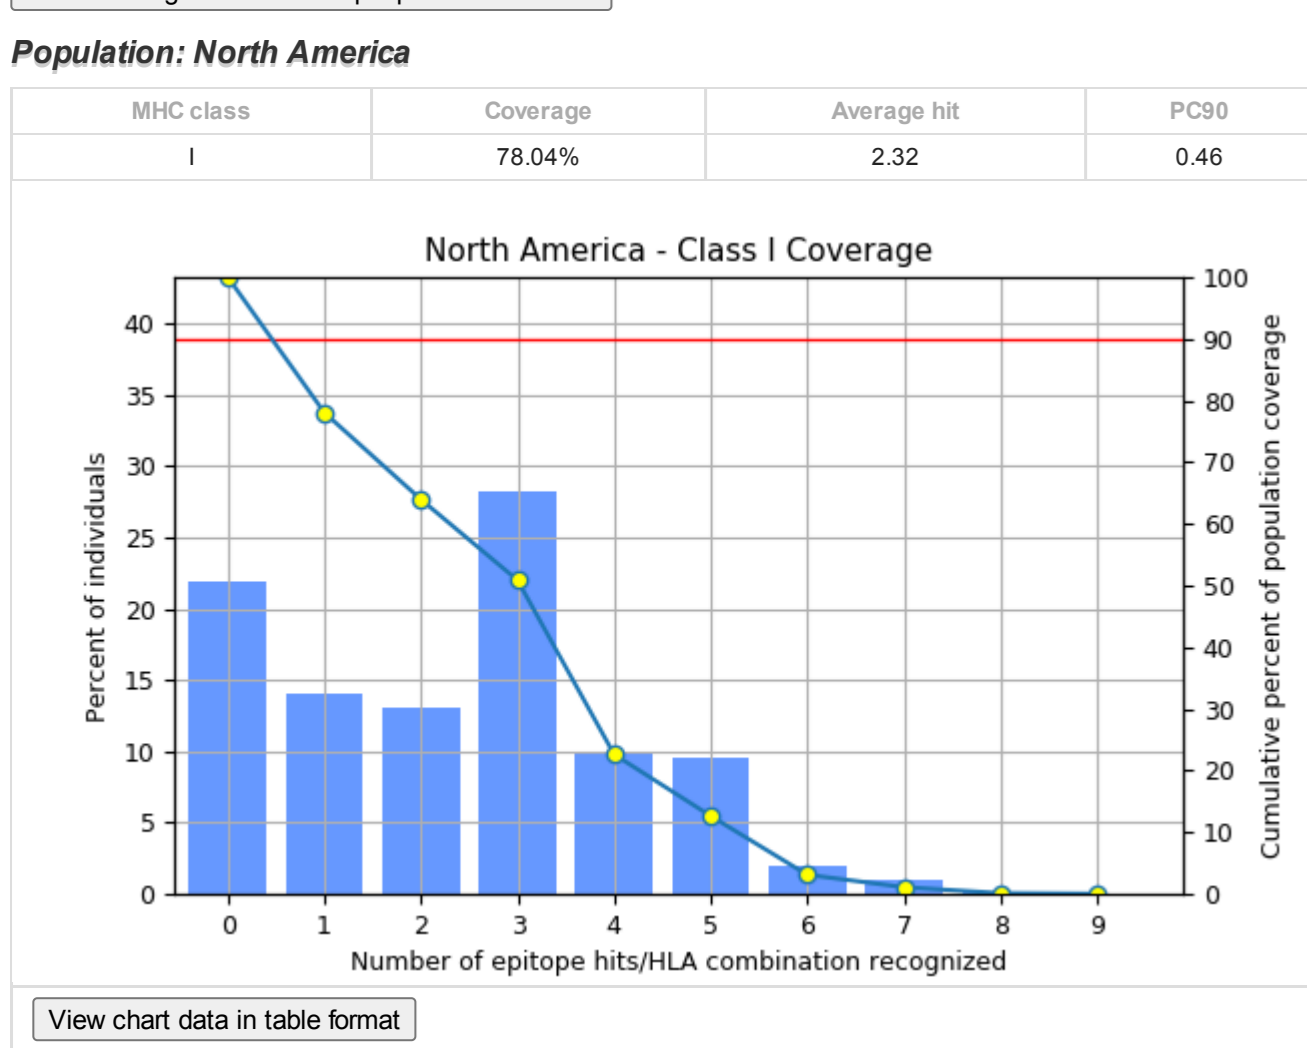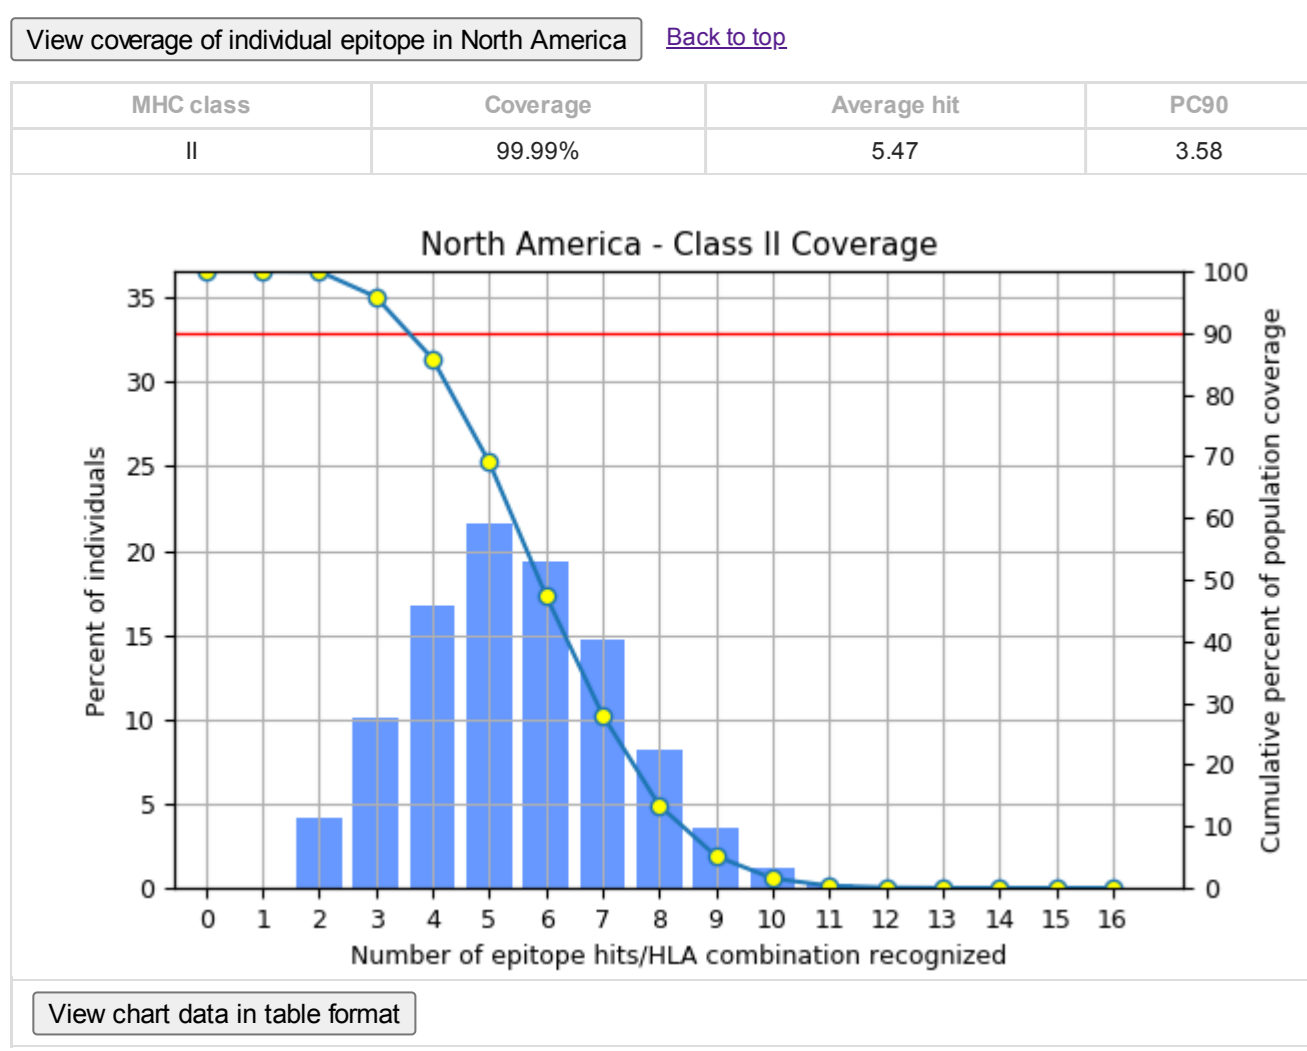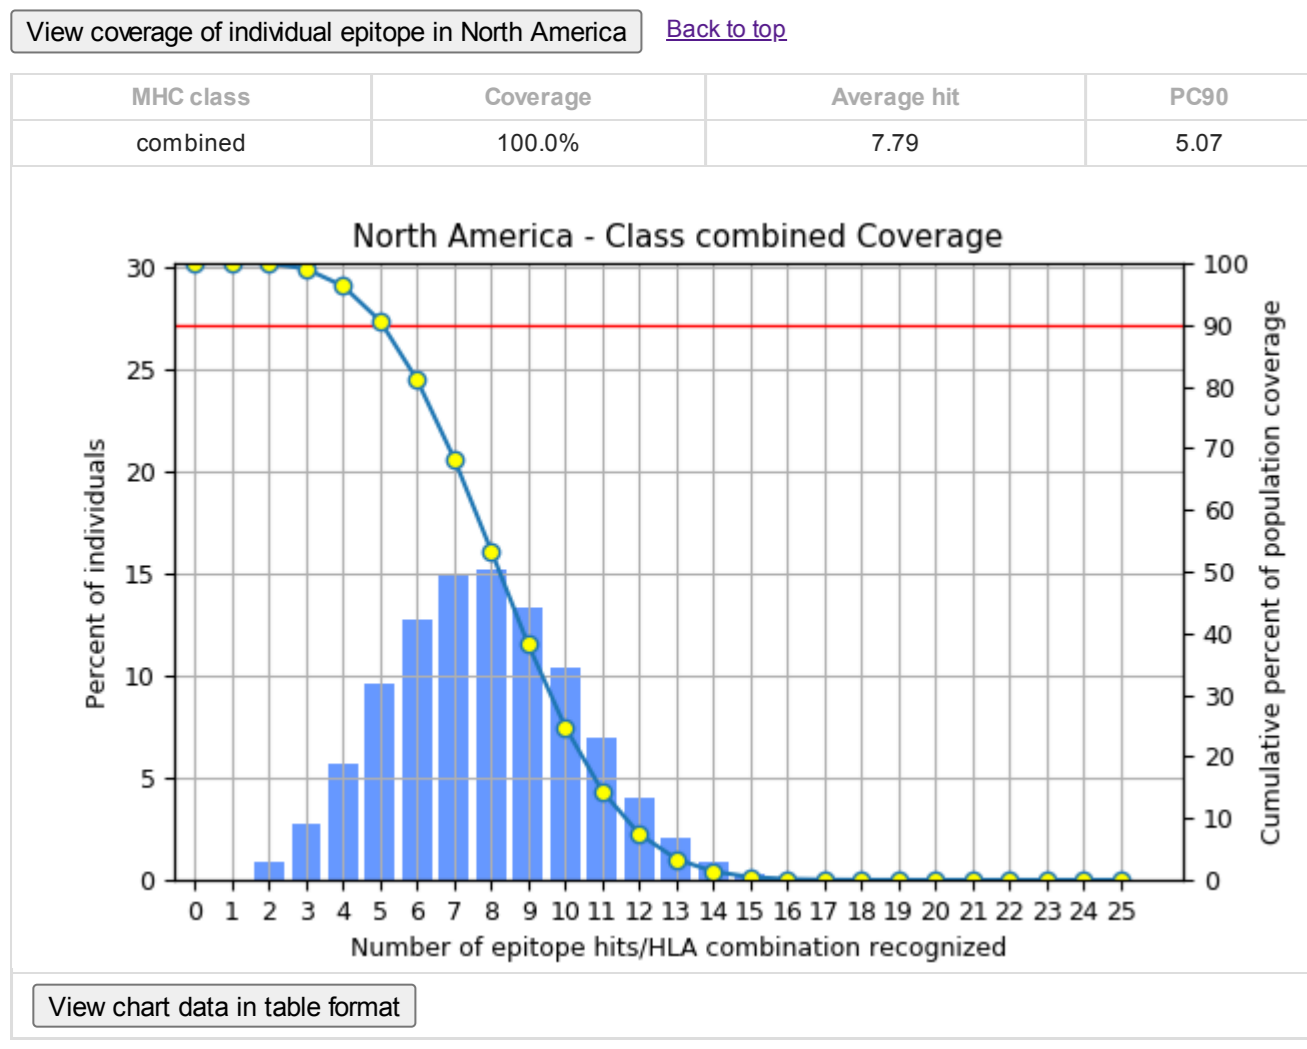

View coverage of individual epitope in North America [Back to top](#)**Population: Northeast Asia**

| MHC class | Coverage | Average hit | PC90 |
|-----------|----------|-------------|------|
| I         | 46.93%   | 0.97        | 0.19 |

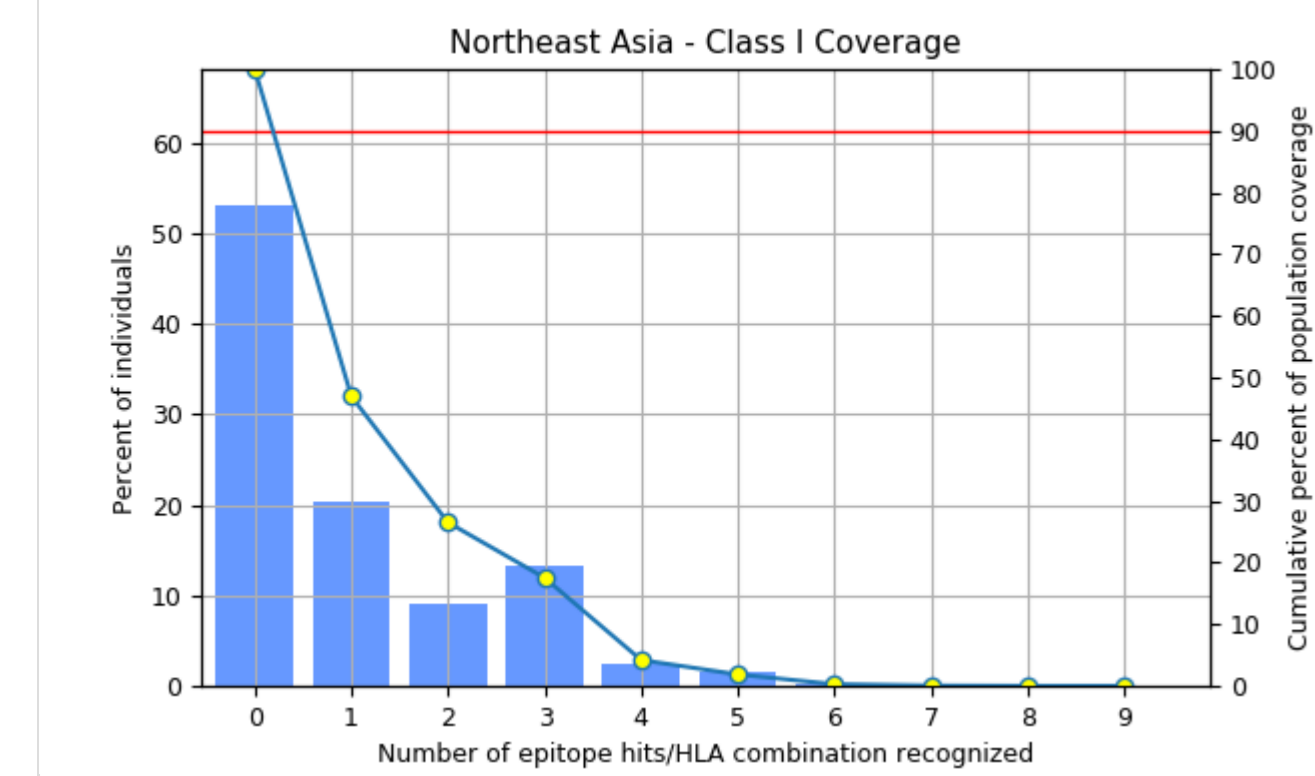[View chart data in table format](#)View coverage of individual epitope in Northeast Asia [Back to top](#)

| MHC class | Coverage | Average hit | PC90 |
|-----------|----------|-------------|------|
| II        | 98.16%   | 4.62        | 2.49 |

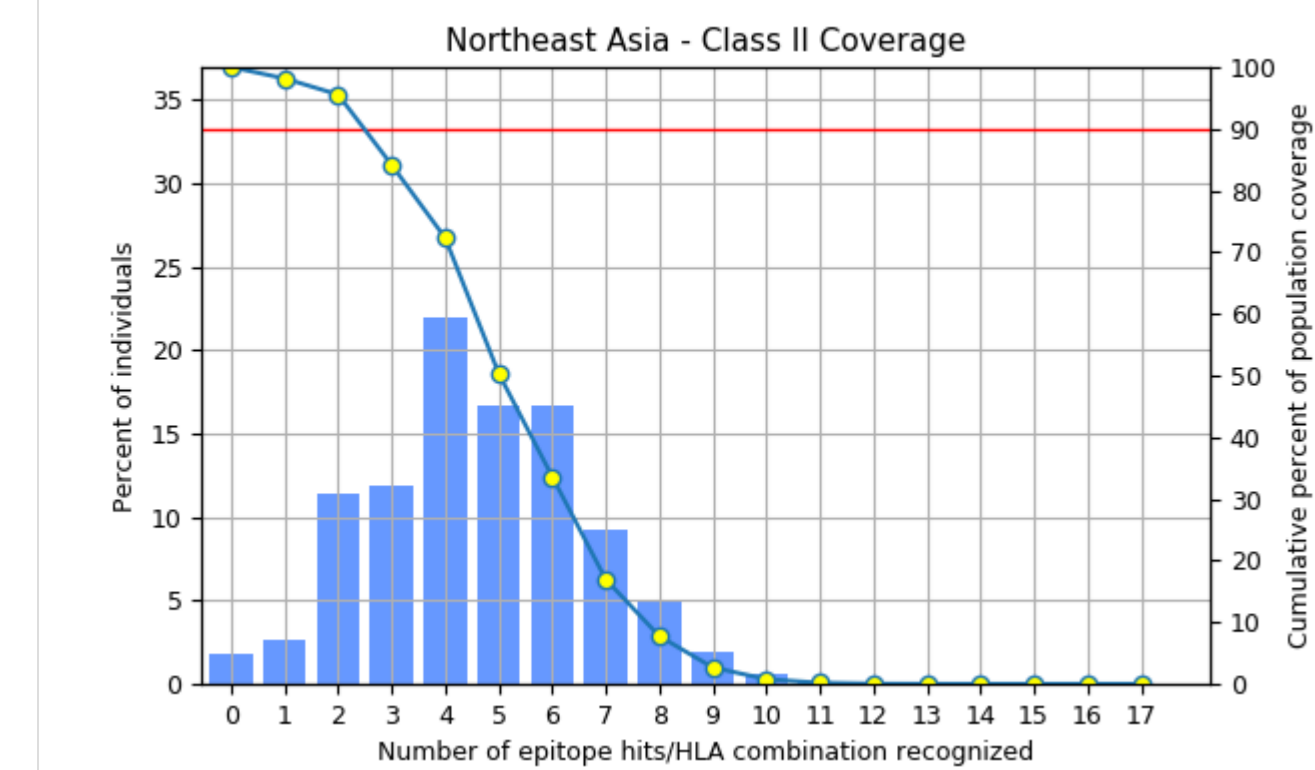[View chart data in table format](#)View coverage of individual epitope in Northeast Asia [Back to top](#)

| MHC class | Coverage | Average hit | PC90 |
|-----------|----------|-------------|------|
| combined  | 99.02%   | 5.6         | 3.08 |

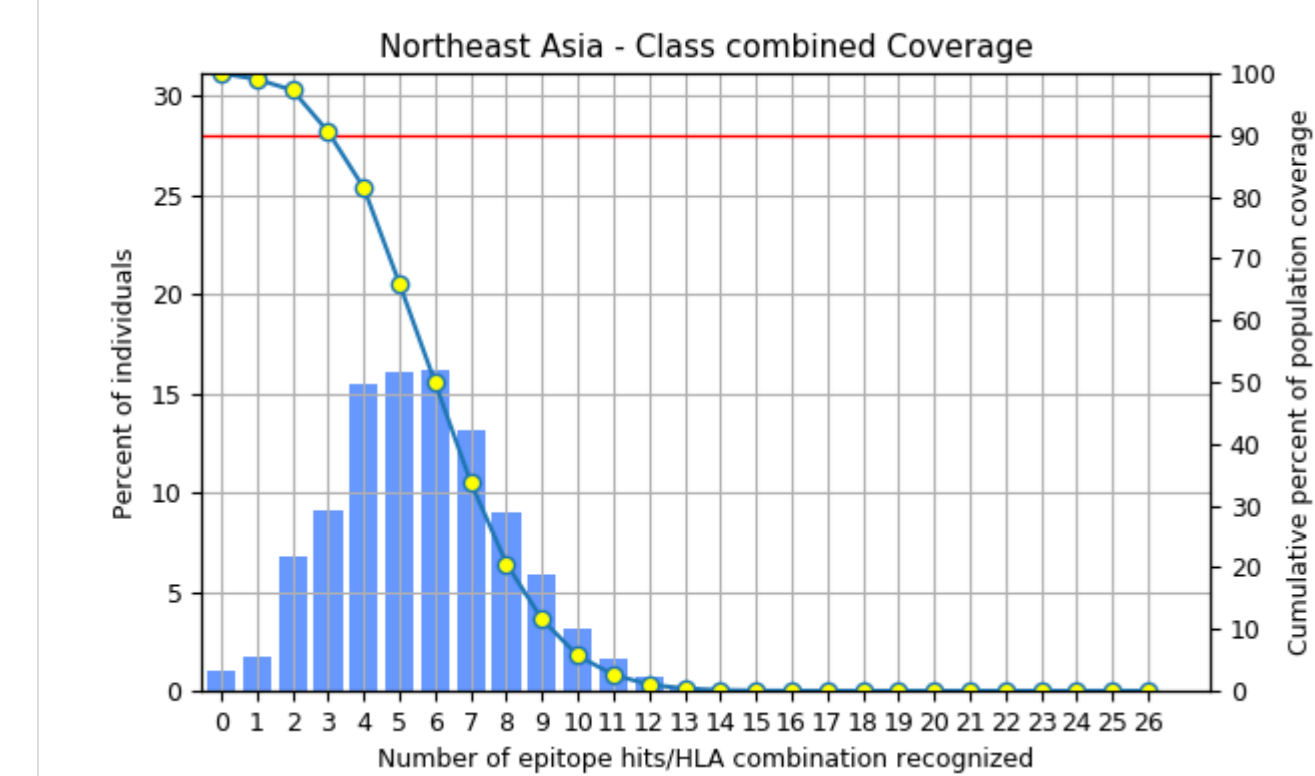[View chart data in table format](#)View coverage of individual epitope in Northeast Asia [Back to top](#)**Population: Oceania**

| MHC class | Coverage | Average hit | PC90 |
|-----------|----------|-------------|------|
| I         | 71.42%   | 1.41        | 0.35 |

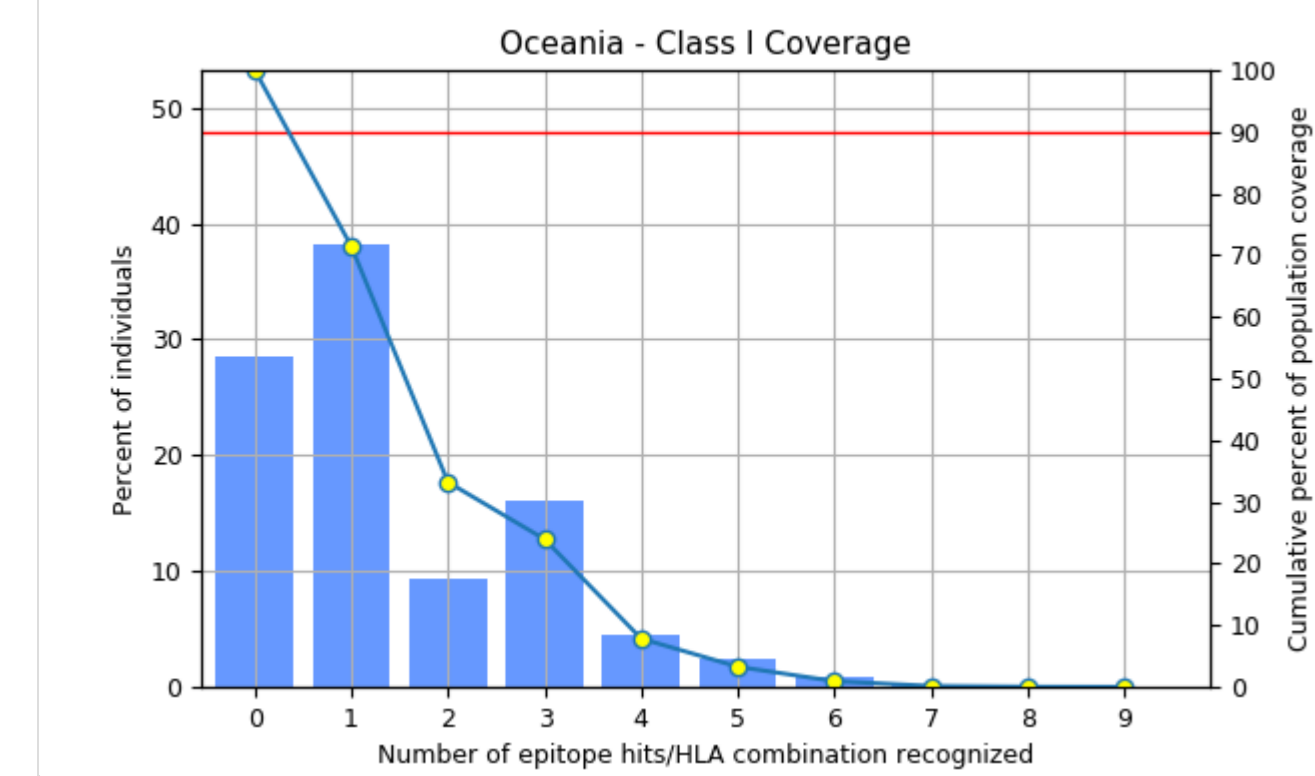[View chart data in table format](#)View coverage of individual epitope in Oceania [Back to top](#)

| MHC class | Coverage | Average hit | PC90 |
|-----------|----------|-------------|------|
| II        | 98.79%   | 5.14        | 2.86 |

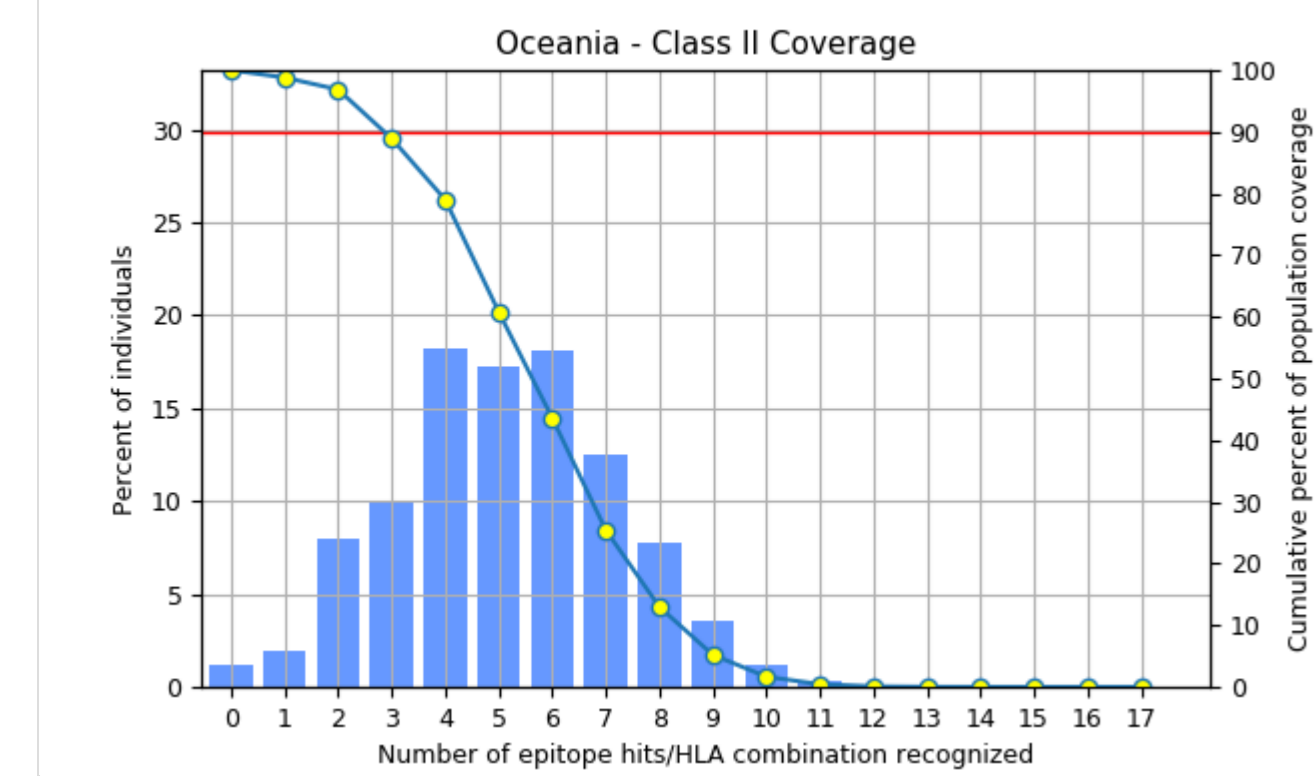[View chart data in table format](#)View coverage of individual epitope in Oceania [Back to top](#)

| MHC class | Coverage | Average hit | PC90 |
|-----------|----------|-------------|------|
| combined  | 99.65%   | 6.55        | 3.88 |

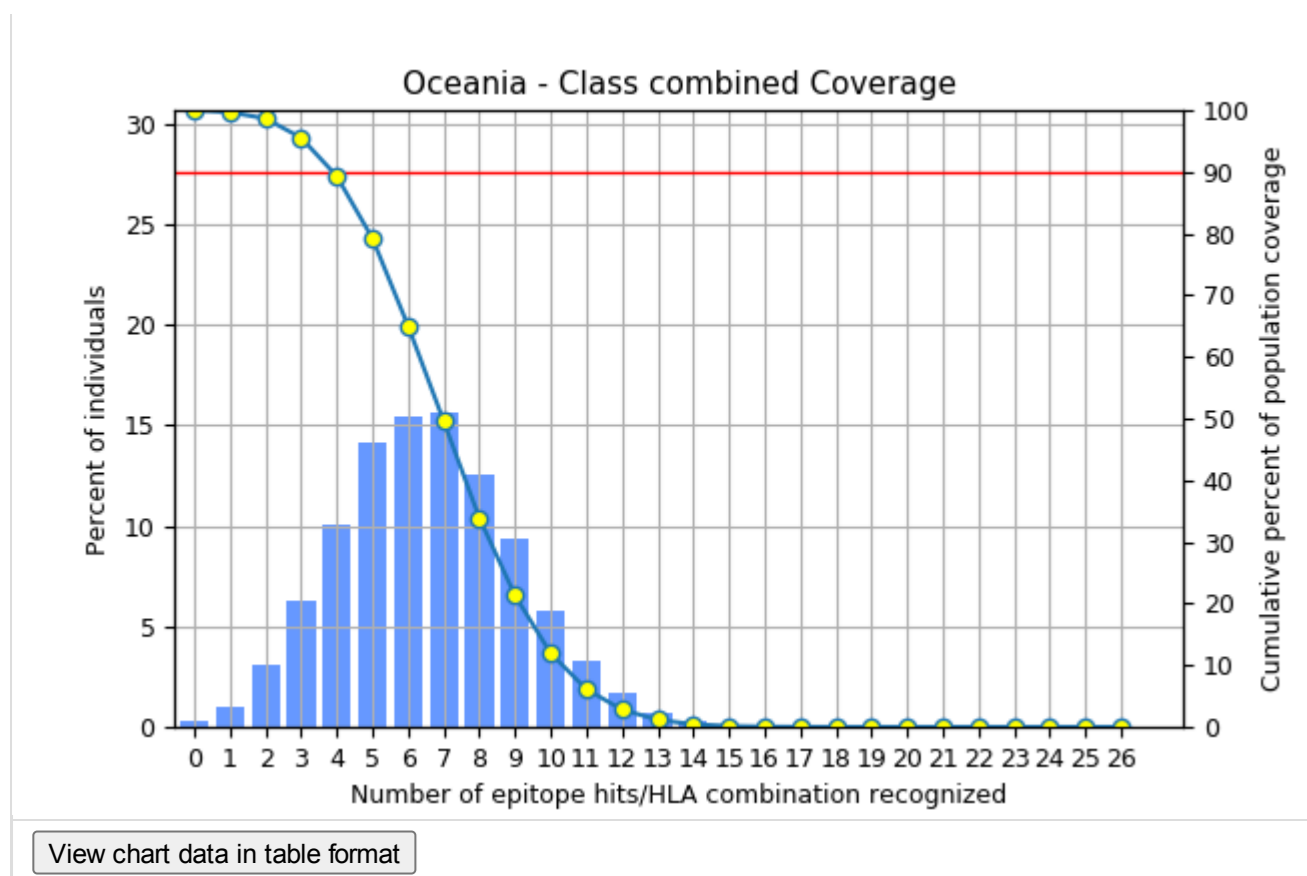

[View coverage of individual epitope in Oceania](#) [Back to top](#)

**Population: South Africa**

| MHC class | Coverage | Average hit | PC90 |
|-----------|----------|-------------|------|
| I         | 40.03%   | 0.8         | 0.17 |

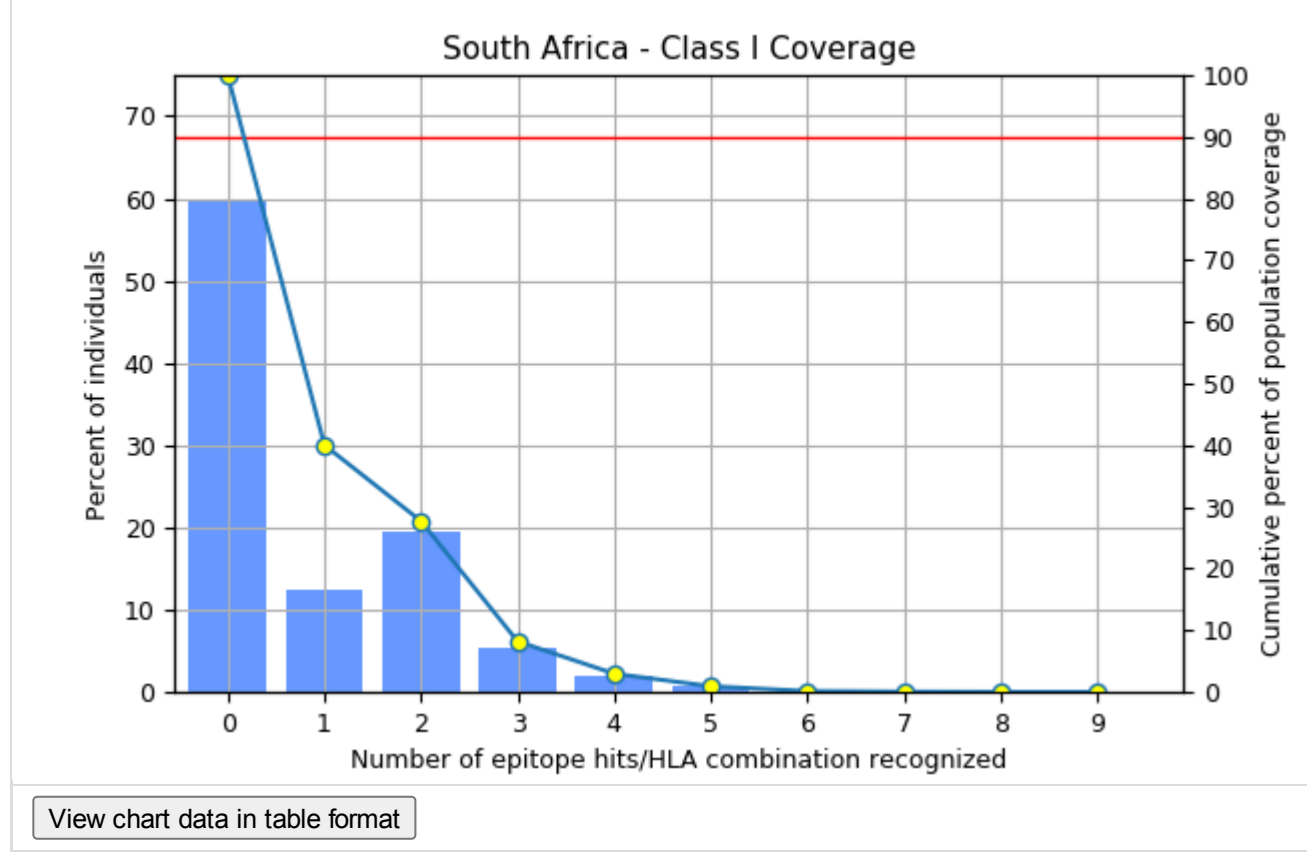

[View coverage of individual epitope in South Africa](#) [Back to top](#)

| MHC class | Coverage | Average hit | PC90 |
|-----------|----------|-------------|------|
| II        | 0.0%     | 0.0         | 0.0  |

[View coverage of individual epitope in South Africa](#) [Back to top](#)

| MHC class | Coverage | Average hit | PC90 |
|-----------|----------|-------------|------|
| combined  | 40.03%   | 0.8         | 0.17 |

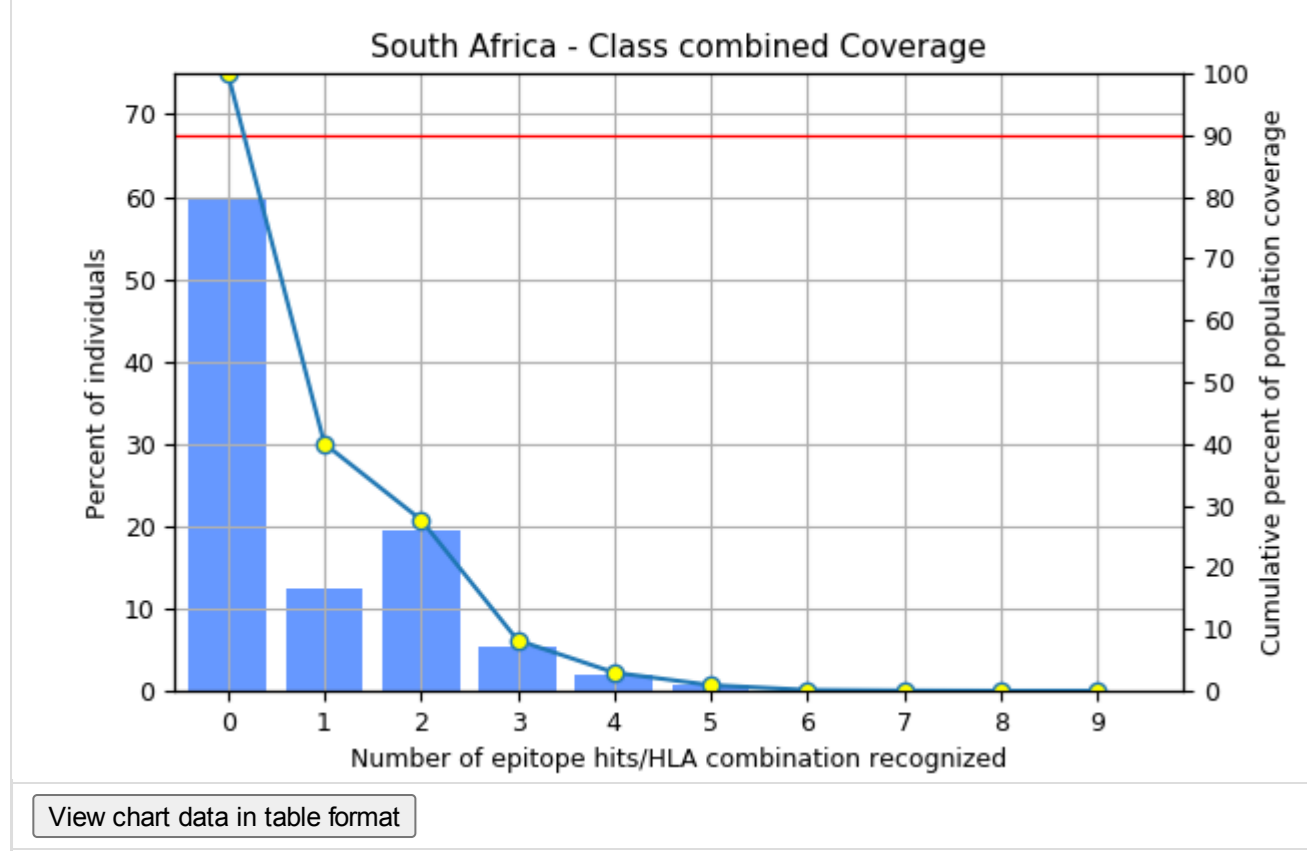

[View coverage of individual epitope in South Africa](#) [Back to top](#)

**Population: South America**

| MHC class | Coverage | Average hit | PC90 |
|-----------|----------|-------------|------|
| I         | 53.26%   | 1.2         | 0.21 |

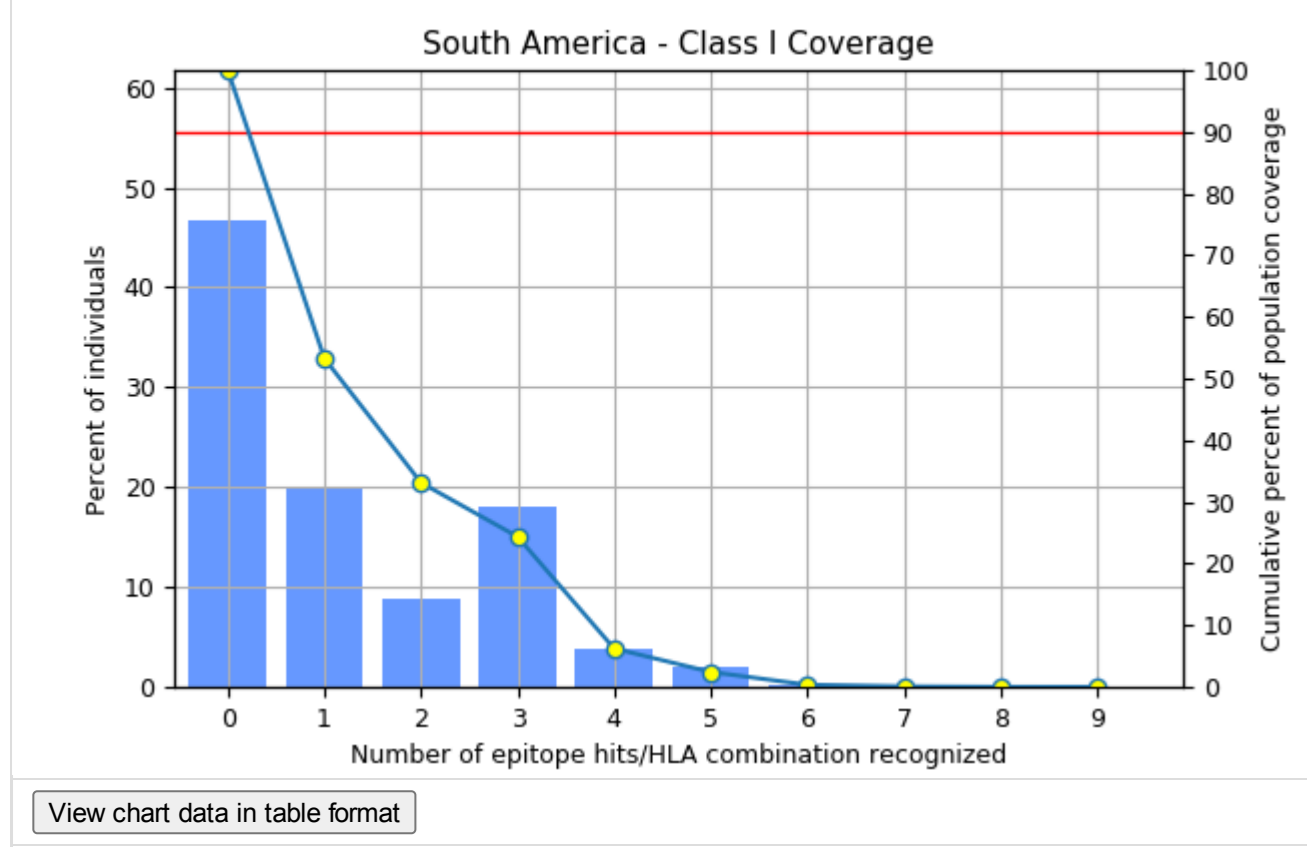

[View coverage of individual epitope in South America](#) [Back to top](#)

| MHC class | Coverage | Average hit | PC90 |
|-----------|----------|-------------|------|
| II        | 99.71%   | 5.63        | 3.52 |

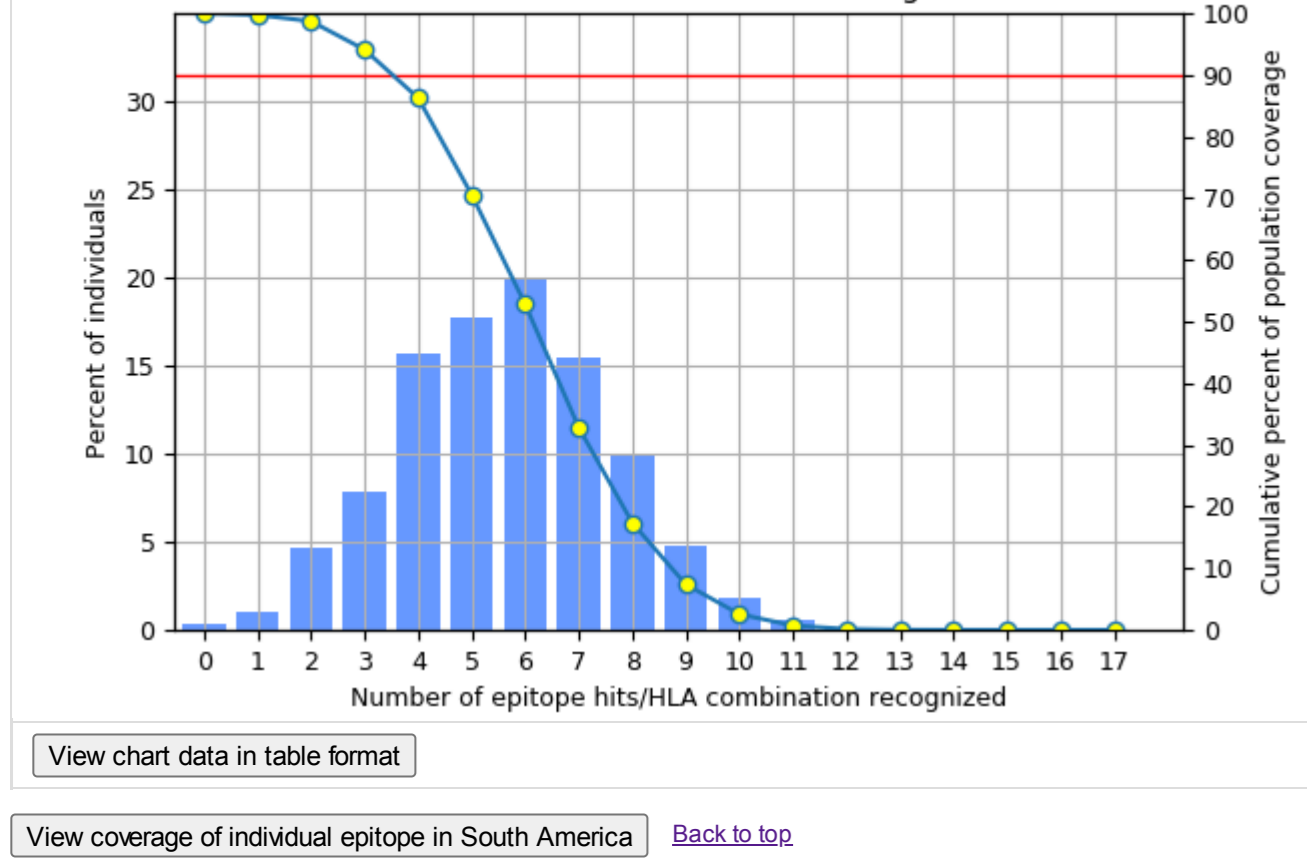

[View coverage of individual epitope in South America](#) [Back to top](#)

| MHC class | Coverage | Average hit | PC90 |
|-----------|----------|-------------|------|
| combined  | 99.86%   | 6.83        | 4.23 |



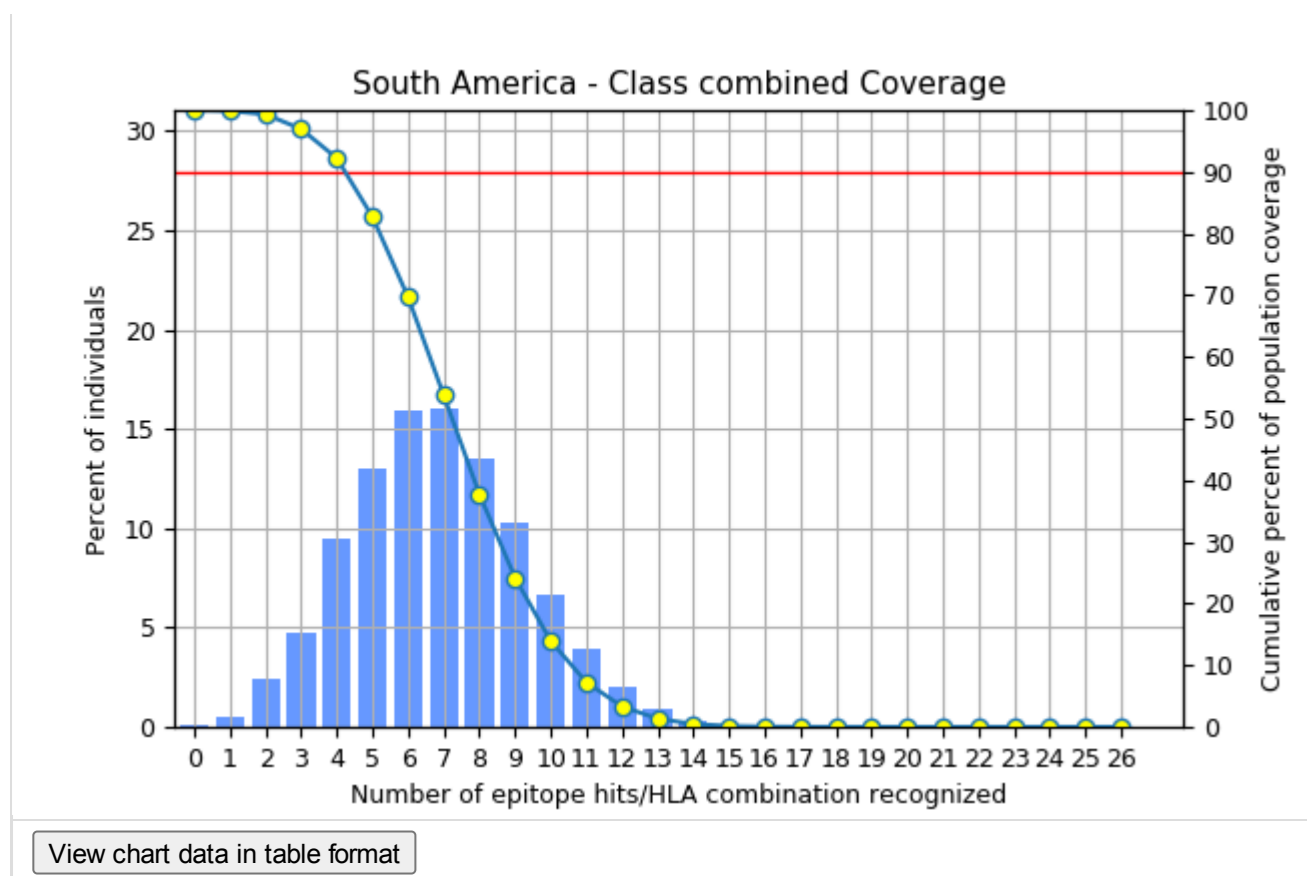

[View coverage of individual epitope in South America](#) [Back to top](#)

**Population: South Asia**

| MHC class | Coverage | Average hit | PC90 |
|-----------|----------|-------------|------|
| I         | 47.74%   | 1.06        | 0.19 |

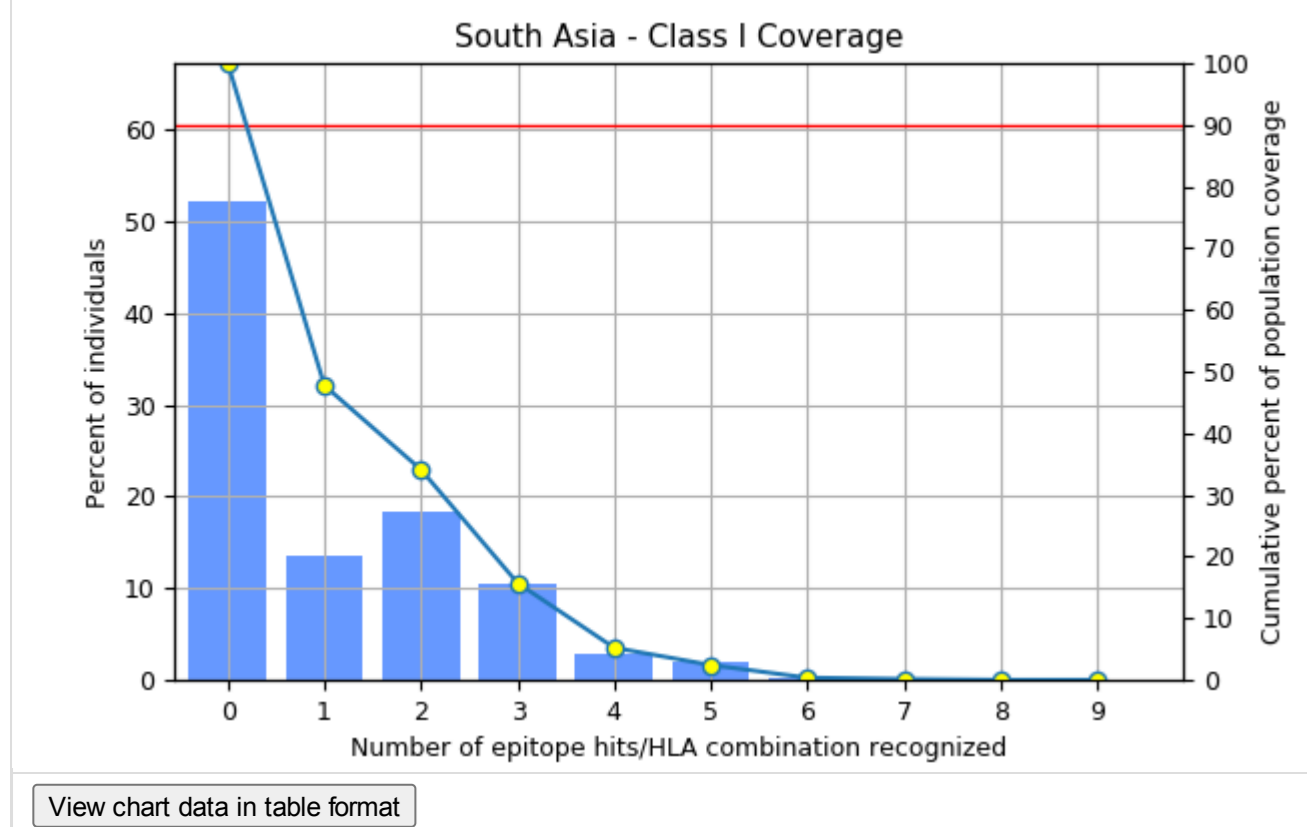

[View coverage of individual epitope in South Asia](#) [Back to top](#)

| MHC class | Coverage | Average hit | PC90 |
|-----------|----------|-------------|------|
| II        | 99.82%   | 4.97        | 3.19 |

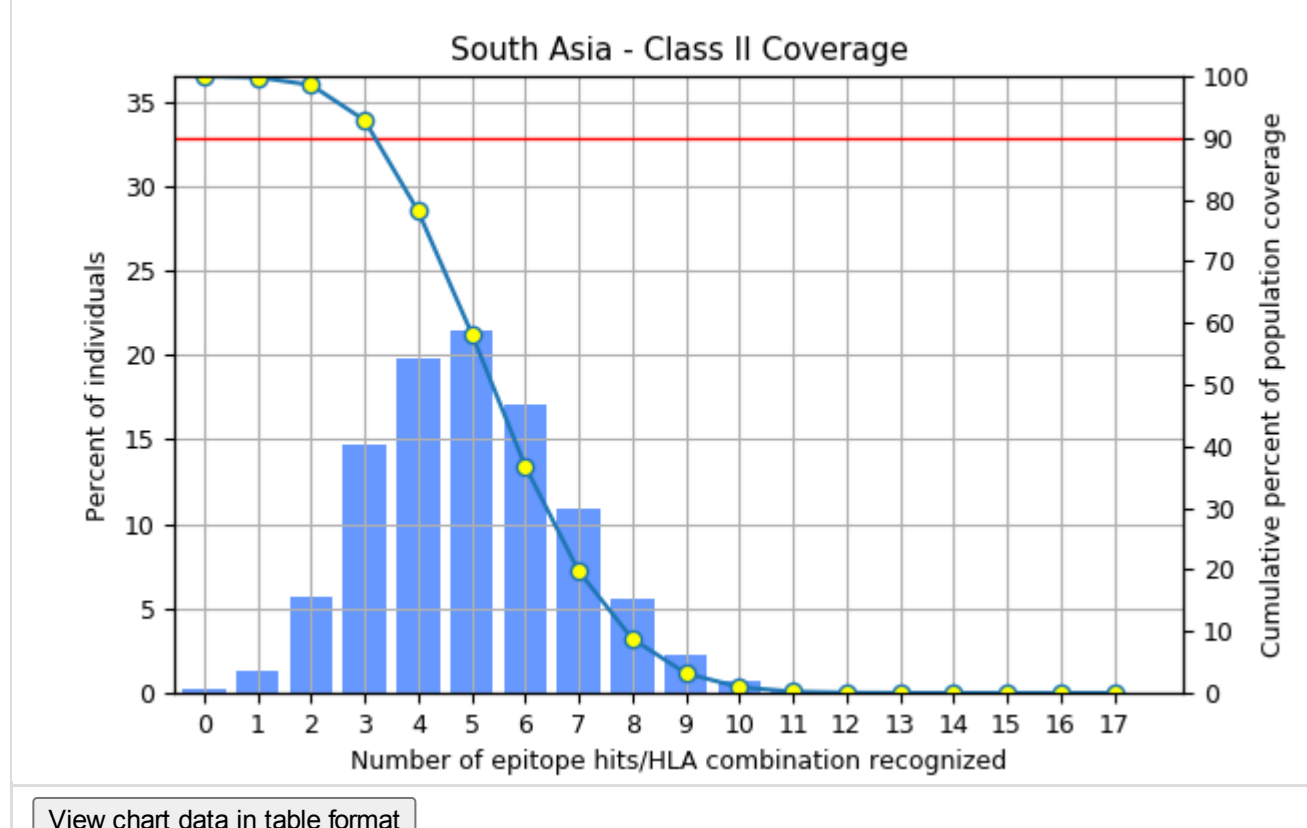

[View coverage of individual epitope in South Asia](#) [Back to top](#)

| MHC class | Coverage | Average hit | PC90 |
|-----------|----------|-------------|------|
| combined  | 99.91%   | 6.03        | 3.69 |

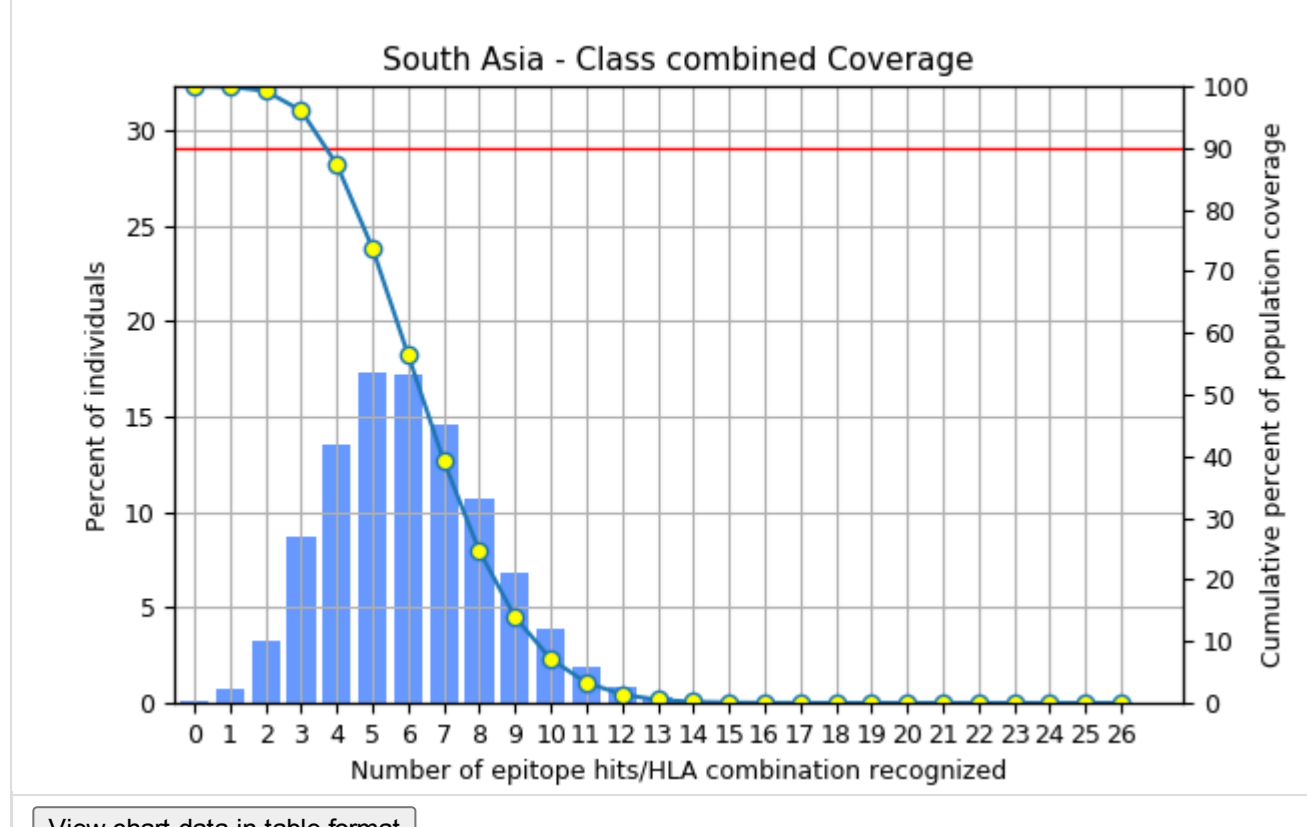

[View coverage of individual epitope in South Asia](#) [Back to top](#)

**Population: Southeast Asia**

| MHC class | Coverage | Average hit | PC90 |
|-----------|----------|-------------|------|
| I         | 63.12%   | 1.33        | 0.27 |

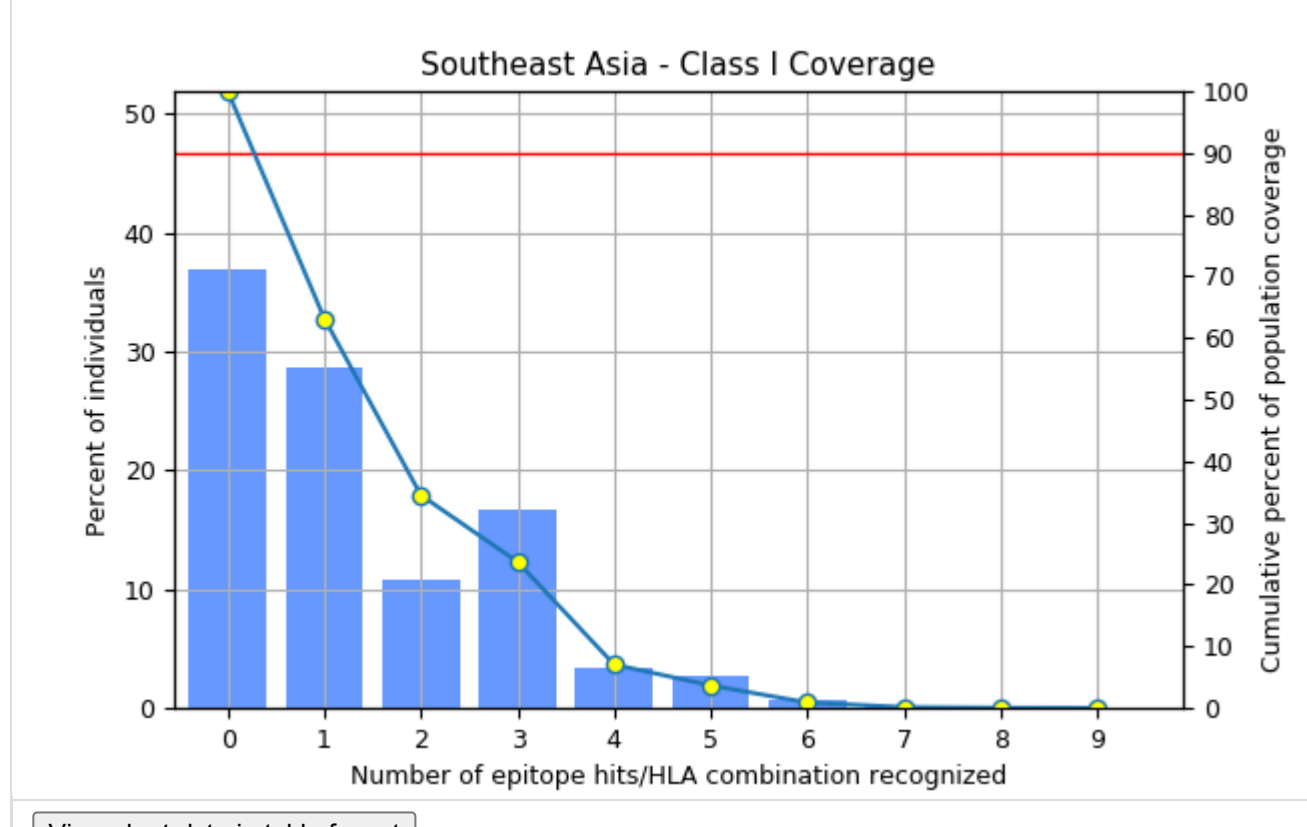

[View coverage of individual epitope in Southeast Asia](#) [Back to top](#)

| MHC class | Coverage | Average hit | PC90 |
|-----------|----------|-------------|------|
| II        | 91.01%   | 2.85        | 1.08 |

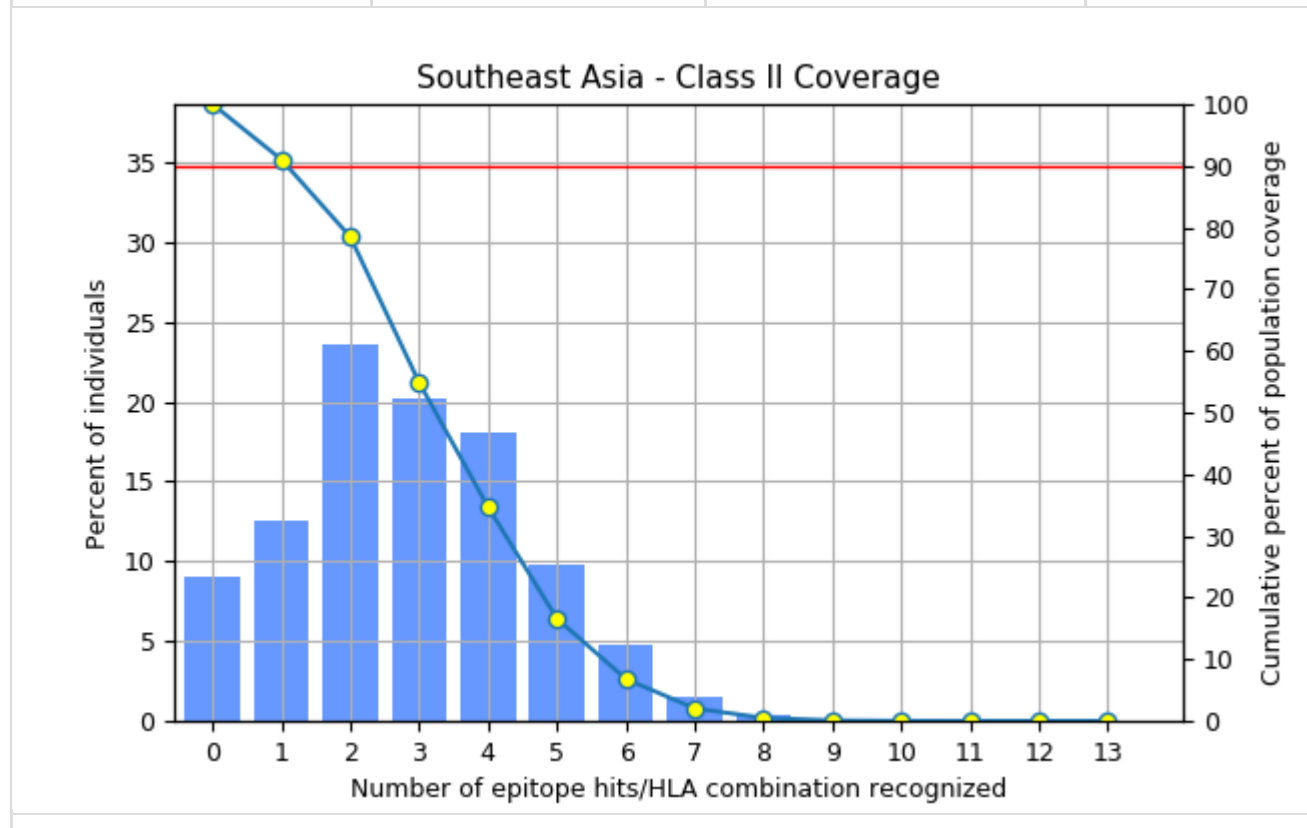

[View chart data in table format](#)[View coverage of individual epitope in Southeast Asia](#) [Back to top](#)

| MHC class | Coverage | Average hit | PC90 |
|-----------|----------|-------------|------|
| combined  | 96.69%   | 4.18        | 1.93 |

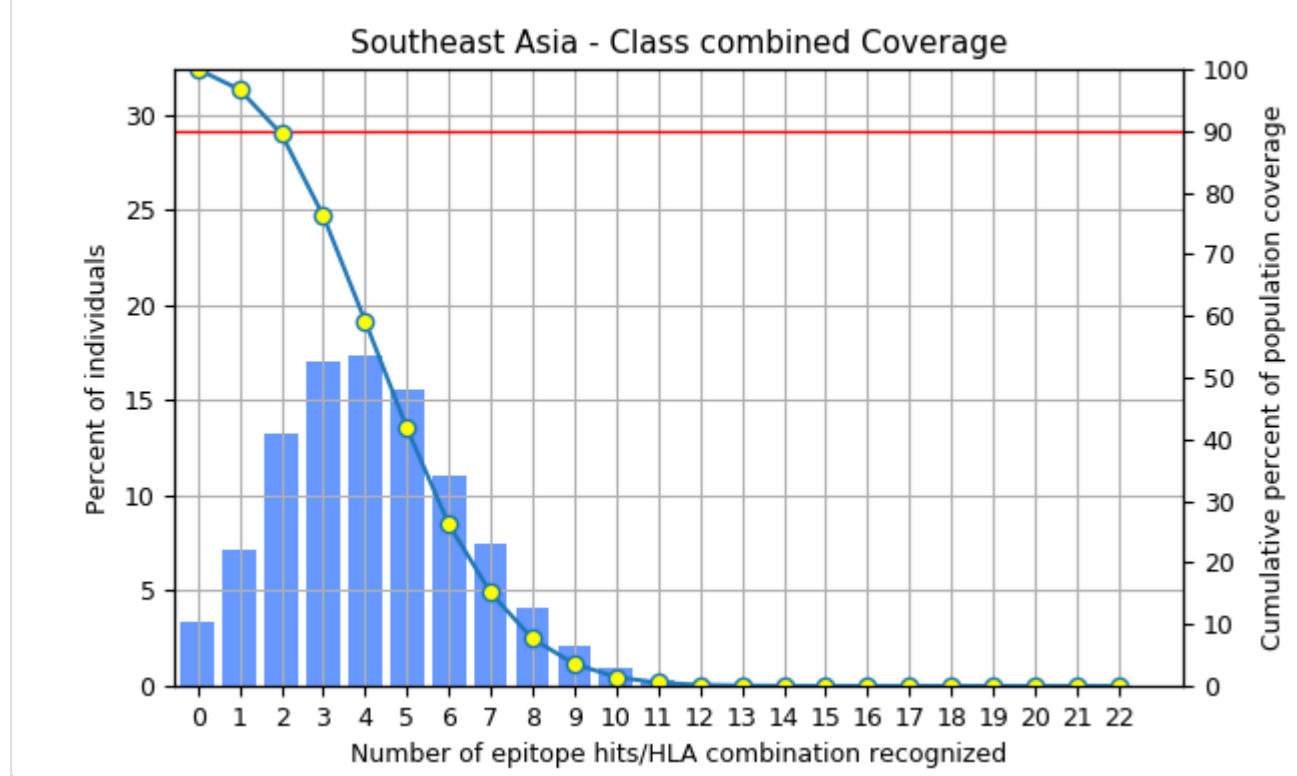[View chart data in table format](#)[View coverage of individual epitope in Southeast Asia](#) [Back to top](#)**Population: Southwest Asia**

| MHC class | Coverage | Average hit | PC90 |
|-----------|----------|-------------|------|
| I         | 53.62%   | 1.42        | 0.22 |

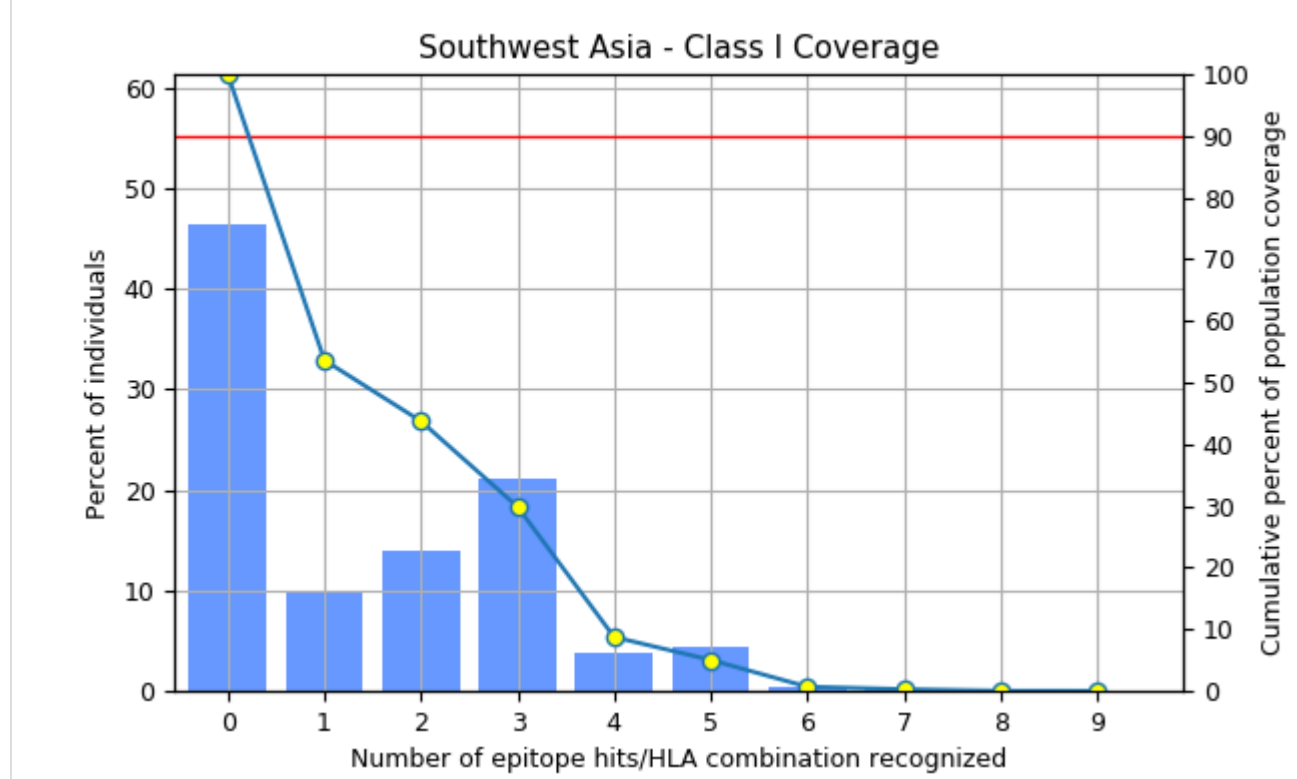[View chart data in table format](#)[View coverage of individual epitope in Southwest Asia](#) [Back to top](#)

| MHC class | Coverage | Average hit | PC90 |
|-----------|----------|-------------|------|
| II        | 95.63%   | 3.03        | 1.37 |

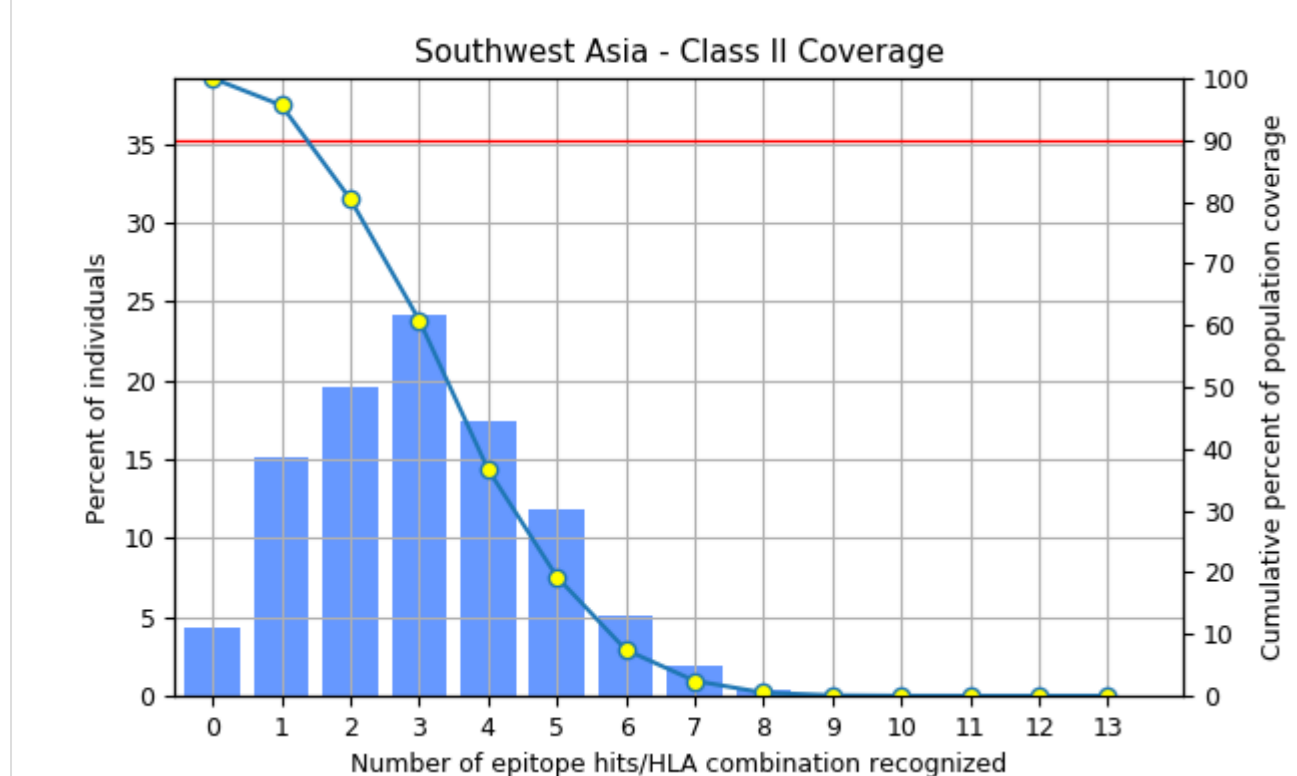[View chart data in table format](#)[View coverage of individual epitope in Southwest Asia](#) [Back to top](#)

| MHC class | Coverage | Average hit | PC90 |
|-----------|----------|-------------|------|
| combined  | 97.97%   | 4.45        | 2.04 |

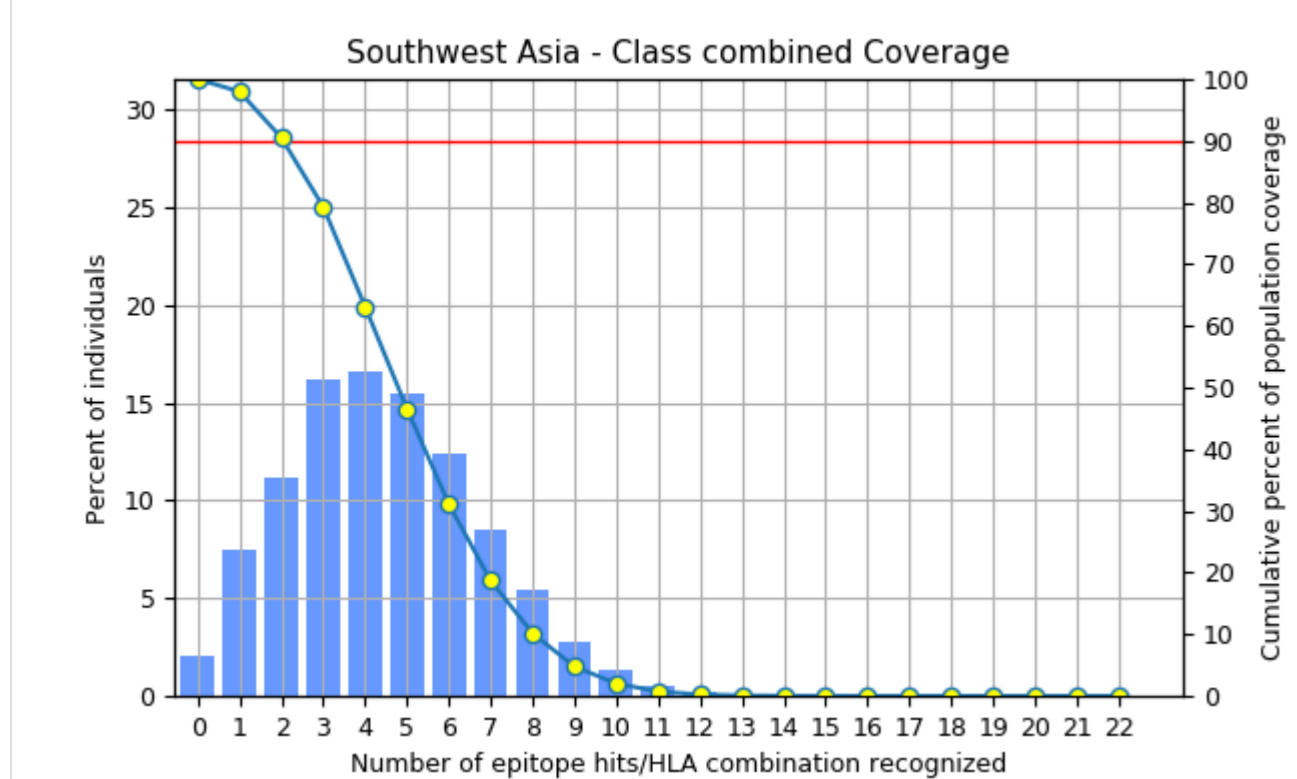[View chart data in table format](#)[View coverage of individual epitope in Southwest Asia](#) [Back to top](#)**Population: West Africa**

| MHC class | Coverage | Average hit | PC90 |
|-----------|----------|-------------|------|
| I         | 48.73%   | 1.26        | 0.2  |

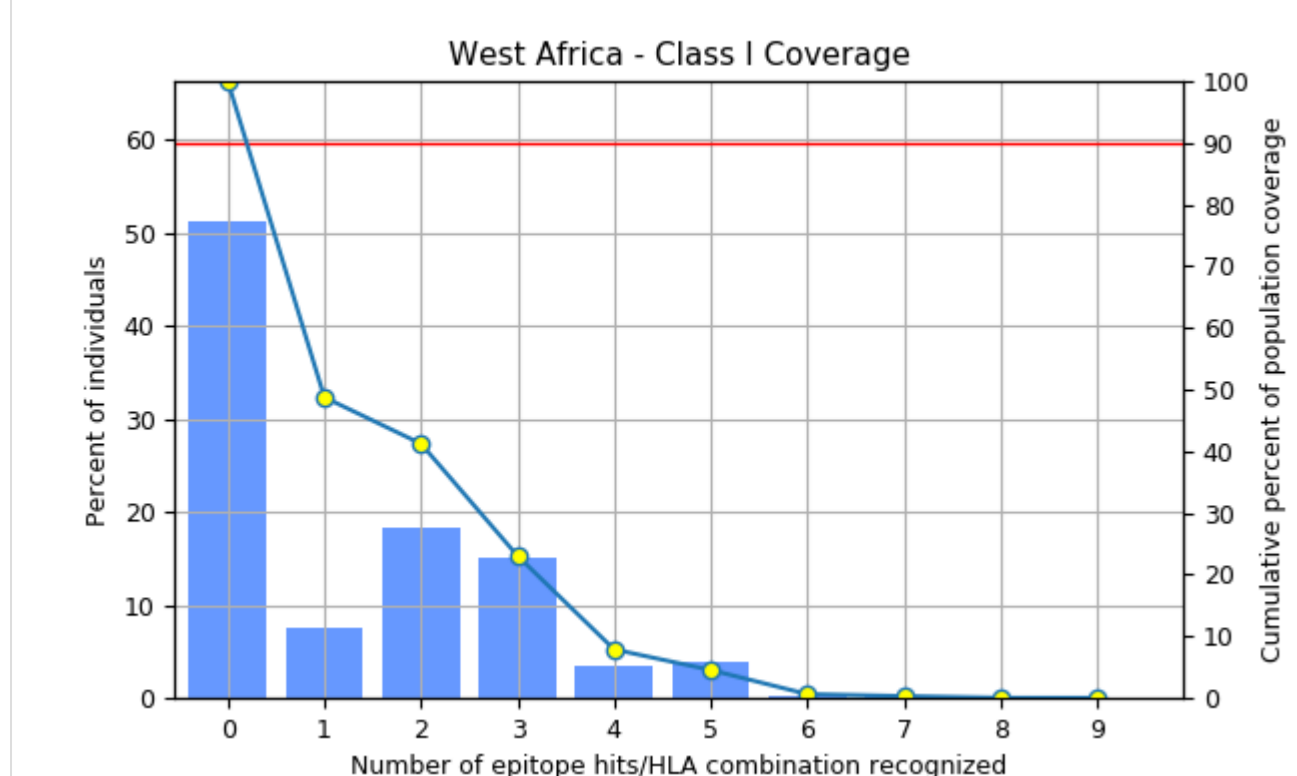[View chart data in table format](#)[View coverage of individual epitope in West Africa](#) [Back to top](#)

| MHC class | Coverage | Average hit | PC90 |
|-----------|----------|-------------|------|
| II        | 99.9%    | 4.99        | 3.23 |



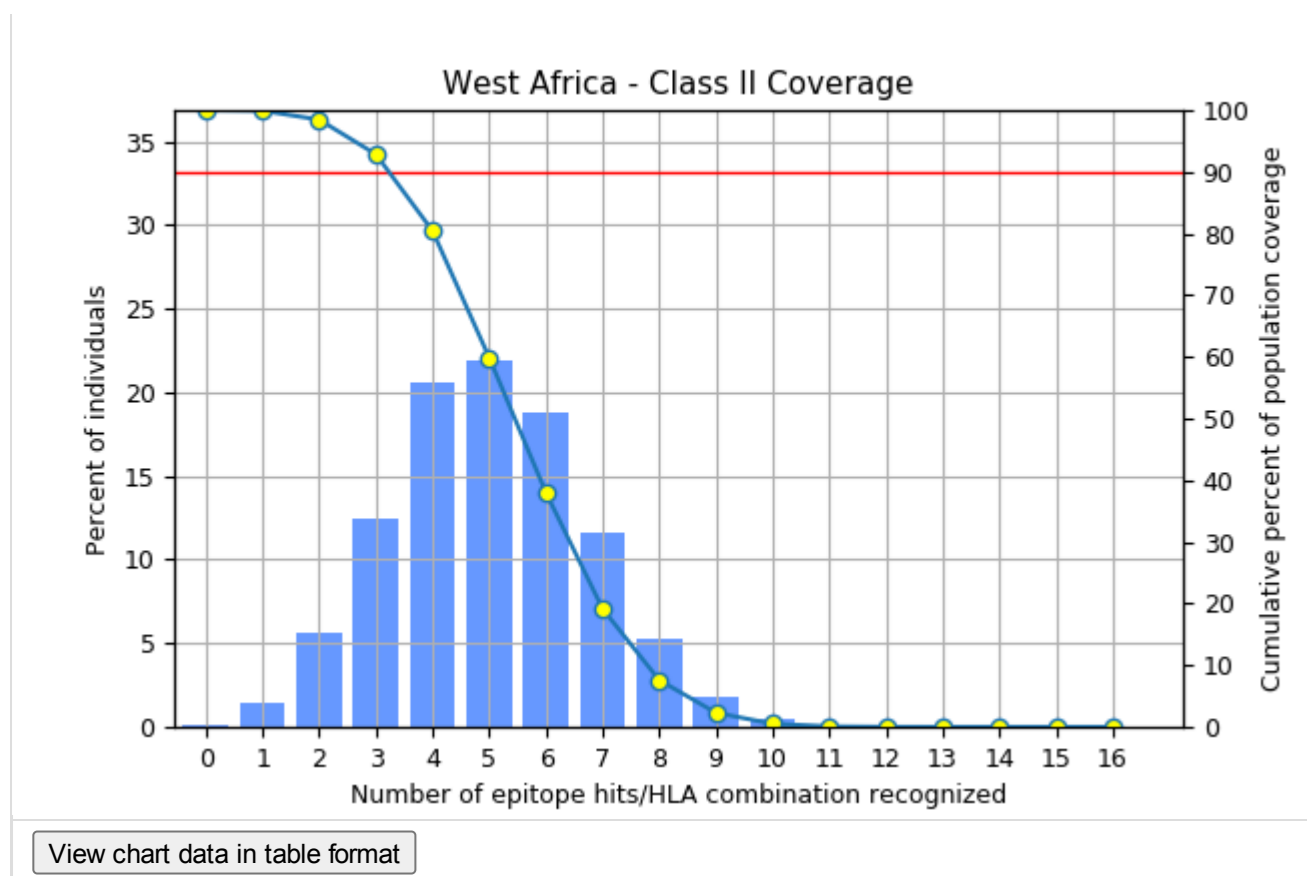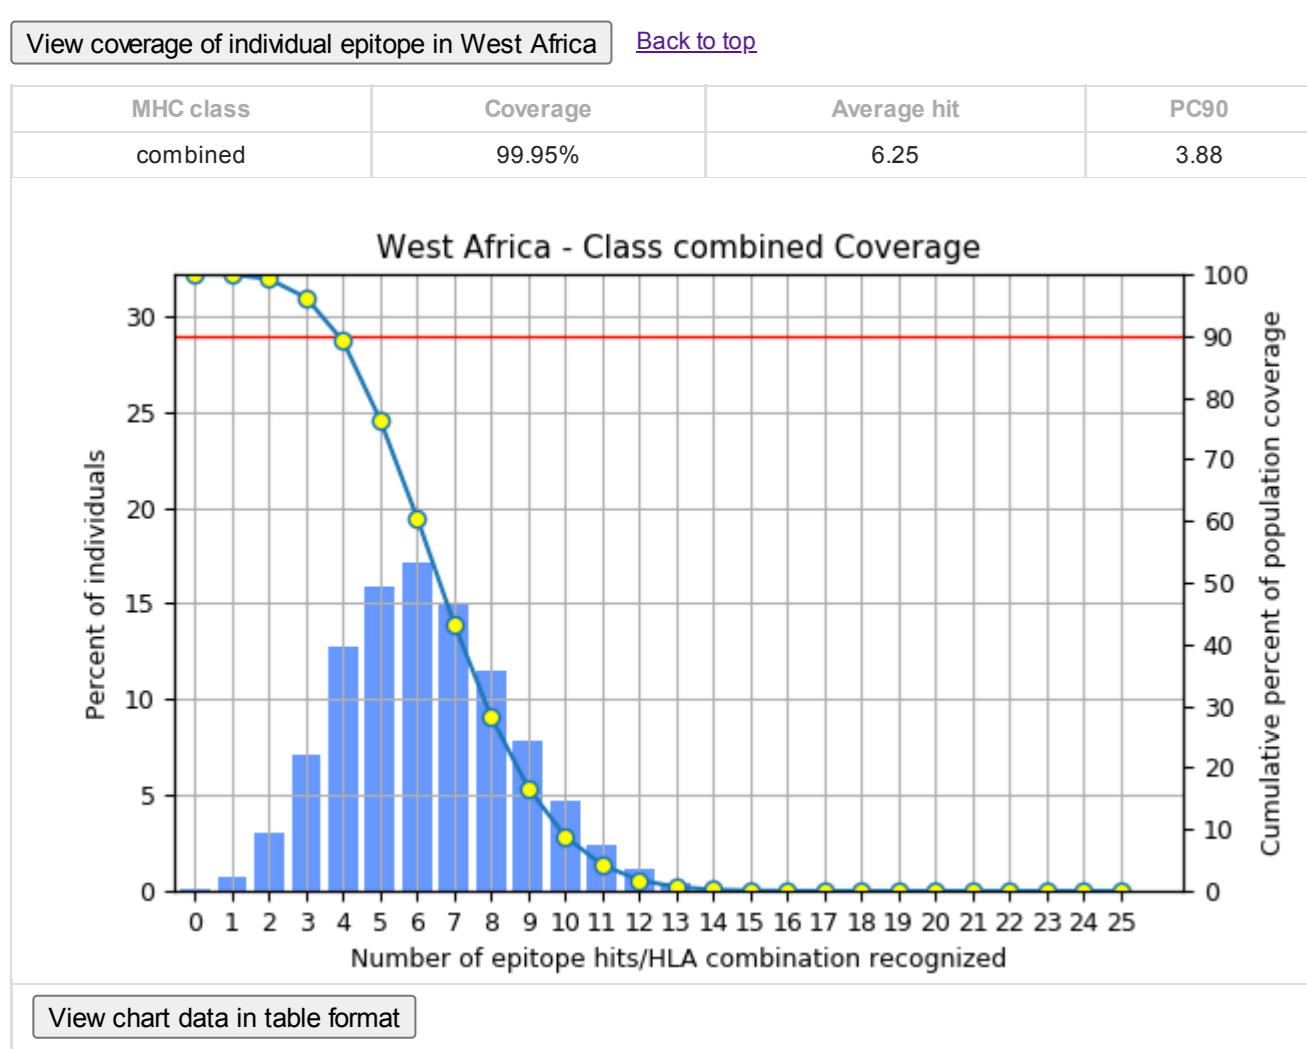

View coverage of individual epitope in West Africa [Back to top](#)

**Population: West Indies**

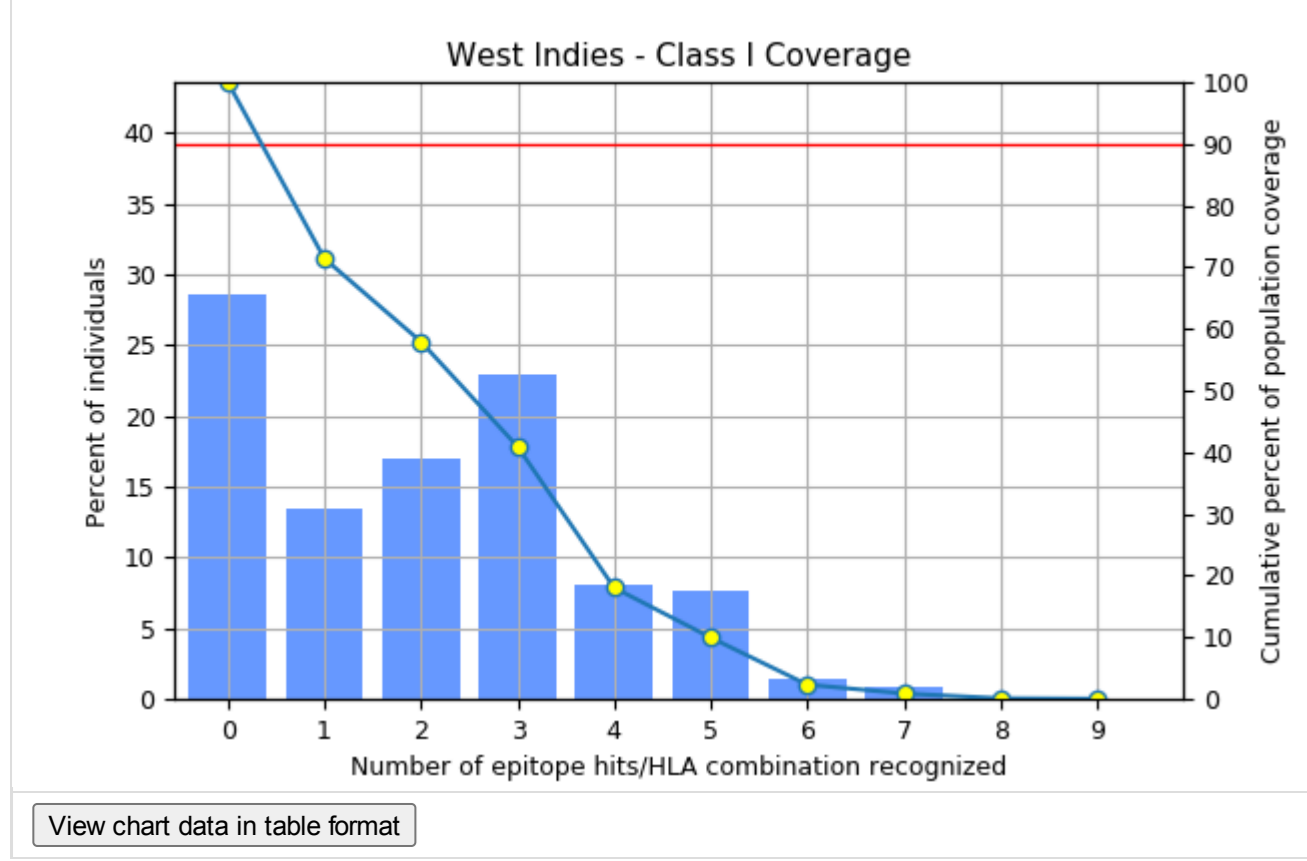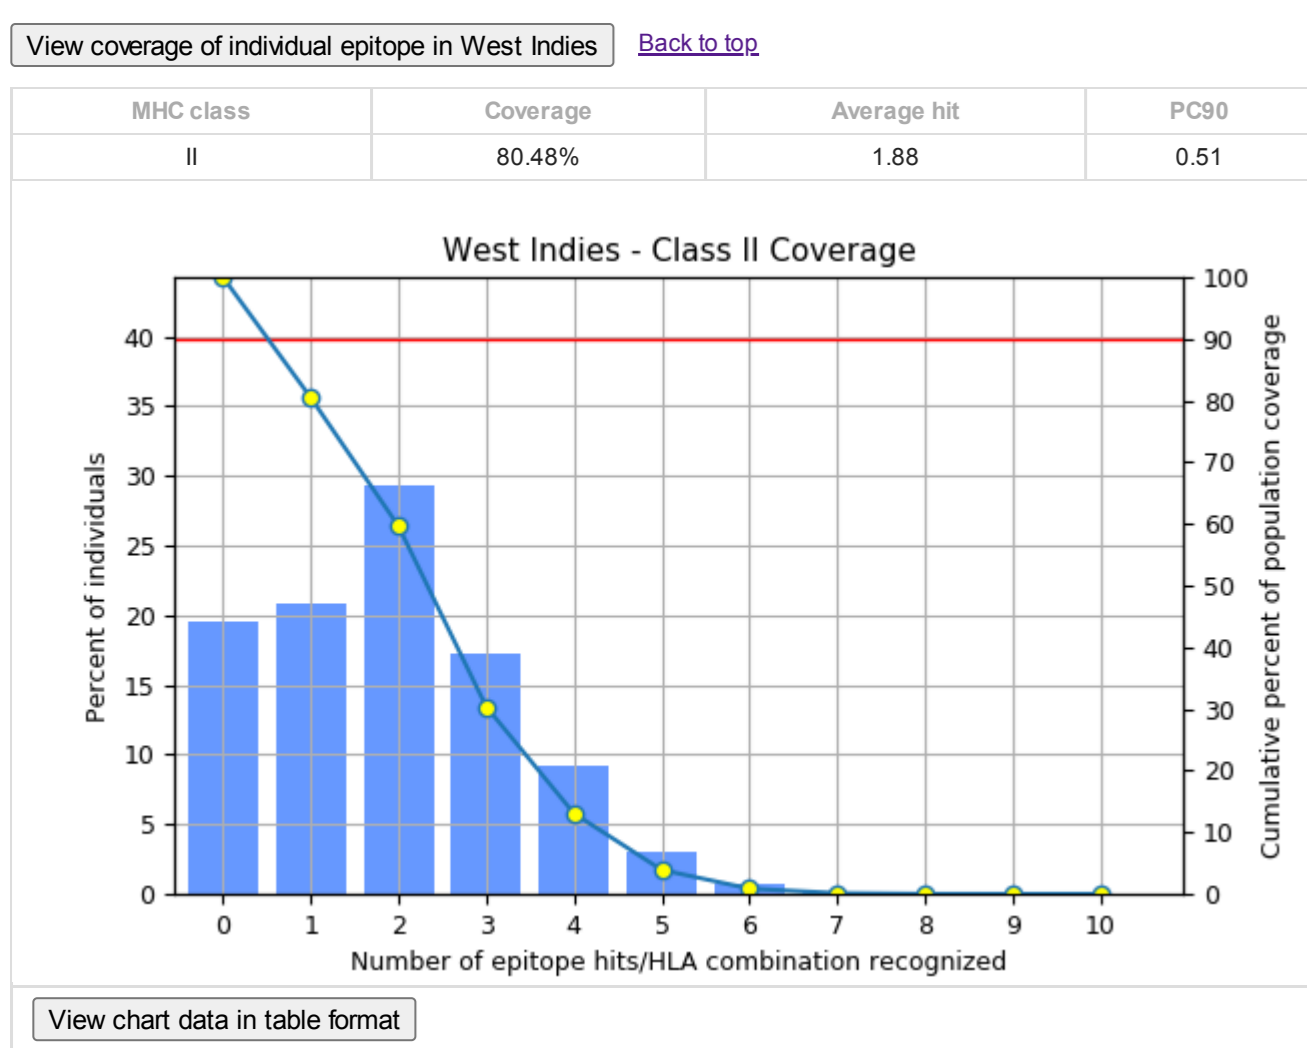

View coverage of individual epitope in West Indies [Back to top](#)

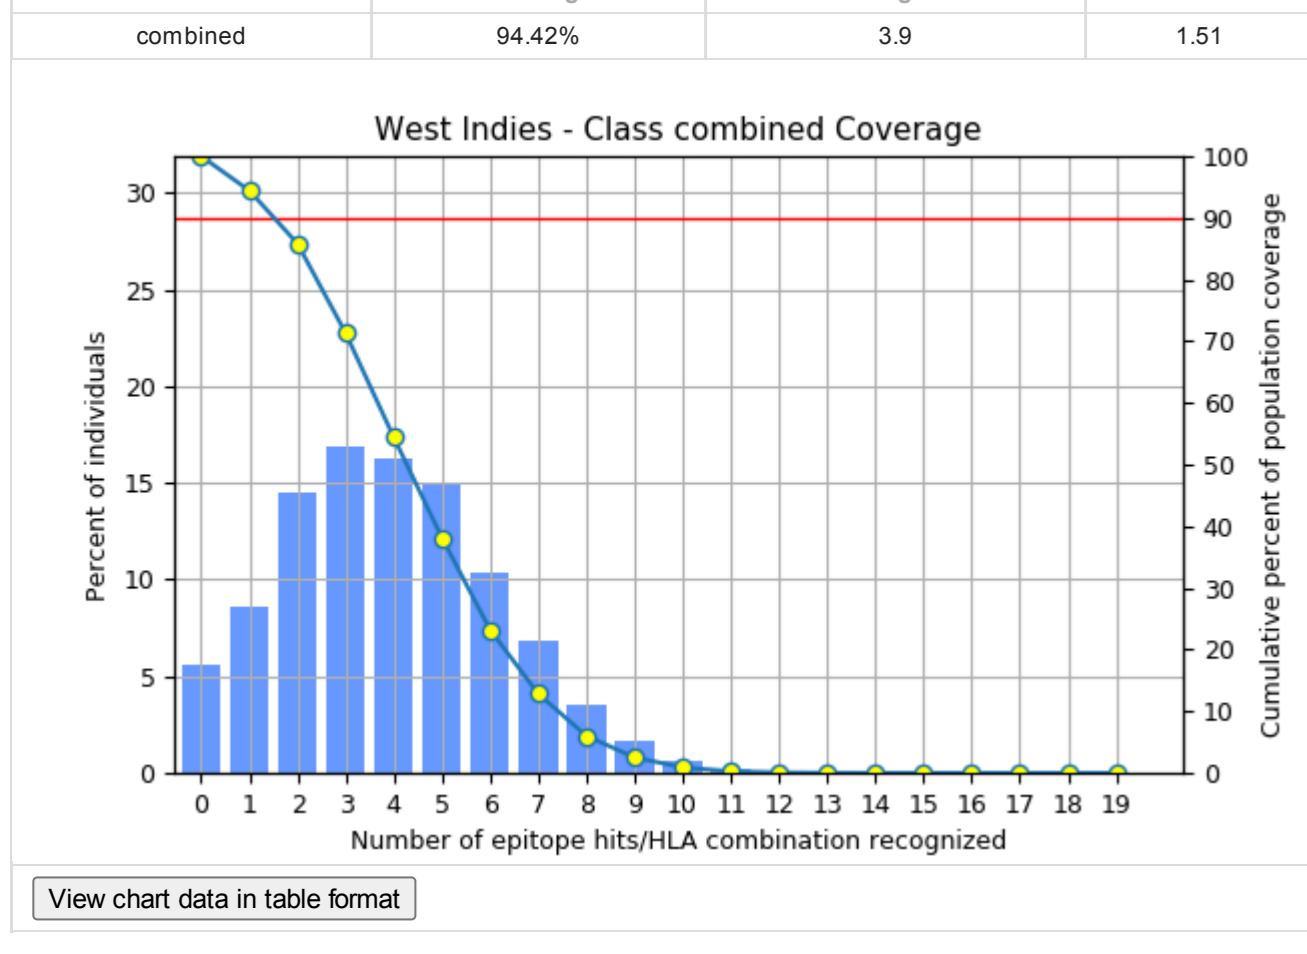

View coverage of individual epitope in West Indies [Back to top](#)

© 2005-2021 | [IEDB Home](#)  
 Supported by a contract from the [National Institute of Allergy and Infectious Diseases](#), a component of the National Institutes of Health in the Department of Health and Human Services.
